# Supplementary material
Source: publisher figshare collection journal article supplement (https://acs.figshare.com/ndownloader/files/5687235)
Supplement: Supplementary file 1 [file 5687235]

# ic000208l.cif

data_cmpd_1
 
_audit_creation_method            SHELXL 

_chemical_name_common             ? 
_chemical_formula_moiety          'Cu4 (C17 H16 N3)4 (Cu Cl2)2,3(C H2 Cl2),H2O' 
_chemical_formula_structural      'Cu4 (DPhIP)4 (Cu Cl2)2, 3(C H2 Cl2),H2O' 
_chemical_formula_analytical      'not measured' 
_chemical_formula_sum             'C71 H72 Cl10 Cu6 N12 O' 
_chemical_formula_weight          1845.14 
_chemical_melting_point           'not measured' 
_chemical_compound_source         synthesis
 
loop_ 
 _atom_type_symbol 
 _atom_type_description 
 _atom_type_scat_dispersion_real 
 _atom_type_scat_dispersion_imag 
 _atom_type_scat_source 
 'C'  'C'   0.0033   0.0016 
 'International Tables Vol C Tables 4.2.6.8 and 6.1.1.4' 
 'H'  'H'   0.0000   0.0000 
 'International Tables Vol C Tables 4.2.6.8 and 6.1.1.4' 
 'N'  'N'   0.0061   0.0033 
 'International Tables Vol C Tables 4.2.6.8 and 6.1.1.4' 
 'Cu'  'Cu'   0.3201   1.2651 
 'International Tables Vol C Tables 4.2.6.8 and 6.1.1.4' 
 'Cl'  'Cl'   0.1484   0.1585 
 'International Tables Vol C Tables 4.2.6.8 and 6.1.1.4' 
 'O'  'O'   0.0106   0.0060 
 'International Tables Vol C Tables 4.2.6.8 and 6.1.1.4' 
 
_symmetry_cell_setting            monoclinic 
_symmetry_space_group_name_H-M    'P 1 21/n 1' 
 
loop_ 
 _symmetry_equiv_pos_as_xyz 
 'x, y, z' 
 '-x+1/2, y+1/2, -z+1/2' 
 '-x, -y, -z' 
 'x-1/2, -y-1/2, z-1/2' 
 
_cell_length_a                    16.907(2) 
_cell_length_b                    16.427(3) 
_cell_length_c                    27.349(7) 
_cell_angle_alpha                 90.00 
_cell_angle_beta                  98.525(7) 
_cell_angle_gamma                 90.00 
_cell_volume                      7511(3)
_cell_formula_units_Z             4 
_cell_measurement_temperature     213(2) 
_cell_measurement_reflns_used     250 
_cell_measurement_theta_min       9.05 
_cell_measurement_theta_max       20.8 
 
_exptl_crystal_description        block 
_exptl_crystal_colour             'dark green' 
_exptl_crystal_size_max           0.27 
_exptl_crystal_size_mid           0.27 
_exptl_crystal_size_min           0.24 
_exptl_crystal_density_meas       'not measured' 
_exptl_crystal_density_diffrn     1.630 
_exptl_crystal_density_method     'not measured' 
_exptl_crystal_F_000              3728 
_exptl_absorpt_coefficient_mu     2.076 
_exptl_absorpt_correction_type    multi-scan
_exptl_absorpt_correction_T_min   0.53 
_exptl_absorpt_correction_T_max   0.61 
 
_exptl_special_details 
; 
 ? 
; 
 
_diffrn_ambient_temperature       213(2) 
_diffrn_radiation_wavelength      0.71073 
_diffrn_radiation_type            MoK\a 
_diffrn_radiation_source          'fine-focus sealed tube' 
_diffrn_radiation_monochromator   graphite 
_diffrn_measurement_device        'Nonius FAST area detector' 
_diffrn_measurement_method        'Ellipsoid-mask fitting' 
_diffrn_standards_number          none 
_diffrn_standards_interval_count  none 
_diffrn_standards_interval_time   none 
_diffrn_standards_decay_%         none 
_diffrn_reflns_number             30096 
_diffrn_reflns_av_R_equivalents   0.0454 
_diffrn_reflns_av_sigmaI/netI     0.0354 
_diffrn_reflns_limit_h_min        -20 
_diffrn_reflns_limit_h_max        20 
_diffrn_reflns_limit_k_min        -19 
_diffrn_reflns_limit_k_max        18 
_diffrn_reflns_limit_l_min        -32 
_diffrn_reflns_limit_l_max        32 
_diffrn_reflns_theta_min          2.40 
_diffrn_reflns_theta_max          22.50 
_reflns_number_total              9810 
_reflns_number_observed           8048 
_reflns_observed_criterion        >2sigma(I) 
 
_computing_data_collection        'MADNES (Enraf-Nonius, 1989)'
_computing_cell_refinement        'MADNES (Enraf-Nonius, 1989)'
_computing_data_reduction         'PROCOR (Kabsch, 1988)'
_computing_structure_solution     'SHELXTL V.5 (Siemens, 1994)'
_computing_structure_refinement   'SHELXL-93 (Sheldrick, 1993)'
_computing_molecular_graphics     'SHELXTL V.5 (Siemens, 1994)'
_computing_publication_material   CIFTAB
 
_refine_special_details 
; 
 Refinement on F^2^ for ALL reflections except for 108 with very negative F^2^ 
 or flagged by the user for potential systematic errors.  Weighted R-factors 
 wR and all goodnesses of fit S are based on F^2^, conventional R-factors R 
 are based on F, with F set to zero for negative F^2^. The observed criterion 
 of F^2^ > 2sigma(F^2^) is used only for calculating _R_factor_obs etc. and is 
 not relevant to the choice of reflections for refinement.  R-factors based 
 on F^2^ are statistically about twice as large as those based on F, and R- 
 factors based on ALL data will be even larger. 
; 
 
_refine_ls_structure_factor_coef  Fsqd  
_refine_ls_matrix_type            full 
_refine_ls_weighting_scheme 
 'calc w=1/[\s^2^(Fo^2^)+(0.1244P)^2^+89.4192P] where P=(Fo^2^+2Fc^2^)/3' 
_atom_sites_solution_primary      direct 
_atom_sites_solution_secondary    difmap 
_atom_sites_solution_hydrogens    geom 
_refine_ls_hydrogen_treatment     noref
_refine_ls_extinction_method      none 
_refine_ls_extinction_coef        ? 
_refine_ls_number_reflns          9702 
_refine_ls_number_parameters      870 
_refine_ls_number_restraints      100 
_refine_ls_R_factor_all           0.1172 
_refine_ls_R_factor_obs           0.0983 
_refine_ls_wR_factor_all          0.2715 
_refine_ls_wR_factor_obs          0.2464 
_refine_ls_goodness_of_fit_all    1.036 
_refine_ls_goodness_of_fit_obs    1.072 
_refine_ls_restrained_S_all       1.062 
_refine_ls_restrained_S_obs       1.069 
_refine_ls_shift/esd_max          0.094 
_refine_ls_shift/esd_mean         0.007 
 
loop_ 
 _atom_site_label 
 _atom_site_type_symbol 
 _atom_site_fract_x 
 _atom_site_fract_y 
 _atom_site_fract_z 
 _atom_site_U_iso_or_equiv 
 _atom_site_thermal_displace_type 
 _atom_site_occupancy 
 _atom_site_calc_flag 
 _atom_site_refinement_flags 
 _atom_site_disorder_group 
Cu1 Cu 0.51380(6) 0.78082(6) 0.20434(4) 0.0322(3) Uani 1 d . . 
Cu2 Cu 0.49178(6) 0.73912(6) 0.28840(4) 0.0339(3) Uani 1 d . . 
Cu3 Cu 0.47228(8) 0.69636(8) 0.37423(4) 0.0485(4) Uani 1 d . . 
Cu4 Cu 0.53796(7) 0.82912(8) 0.12016(4) 0.0421(4) Uani 1 d . . 
N1 N 0.5469(5) 0.8857(4) 0.2433(3) 0.037(2) Uani 1 d . . 
N2 N 0.5215(5) 0.8455(4) 0.3202(3) 0.039(2) Uani 1 d . . 
N3 N 0.4988(6) 0.8005(6) 0.3960(3) 0.056(2) Uani 1 d . . 
N4 N 0.3788(5) 0.7772(5) 0.2607(3) 0.038(2) Uani 1 d . . 
N5 N 0.4038(5) 0.8213(5) 0.1846(3) 0.040(2) Uani 1 d . . 
N6 N 0.4354(5) 0.8716(6) 0.1113(3) 0.049(2) Uani 1 d . . 
N7 N 0.4787(5) 0.6622(4) 0.1916(3) 0.037(2) Uani 1 d . . 
N8 N 0.4587(4) 0.6258(4) 0.2701(3) 0.036(2) Uani 1 d . . 
N9 N 0.4441(5) 0.5930(5) 0.3492(3) 0.039(2) Uani 1 d . . 
N10 N 0.6123(4) 0.7139(5) 0.2903(3) 0.037(2) Uani 1 d . . 
N11 N 0.6271(4) 0.7445(4) 0.2109(3) 0.033(2) Uani 1 d . . 
N12 N 0.6405(4) 0.7838(4) 0.1316(3) 0.036(2) Uani 1 d . . 
C1 C 0.5789(11) 0.9431(14) 0.2125(11) 0.033(2) Uiso 0.59(2) d PD 1 
C2 C 0.5276(9) 0.9990(10) 0.1849(7) 0.034(4) Uiso 0.59(2) d PD 1 
C3 C 0.5607(11) 1.0564(12) 0.1558(7) 0.046(5) Uiso 0.59(2) d PD 1 
C4 C 0.6420(12) 1.0529(13) 0.1527(6) 0.038(5) Uiso 0.59(2) d PD 1 
C5 C 0.6913(12) 0.9944(14) 0.1786(8) 0.043(6) Uiso 0.59(2) d PD 1 
C6 C 0.6625(14) 0.9379(17) 0.2129(12) 0.081(14) Uiso 0.59(2) d PD 1 
C1' C 0.5706(15) 0.9517(19) 0.2111(16) 0.033(2) Uiso 0.41(2) d PD 2 
C2' C 0.5201(13) 1.0188(17) 0.2009(12) 0.054(9) Uiso 0.41(2) d PD 2 
C3' C 0.5423(15) 1.0792(17) 0.1687(12) 0.061(9) Uiso 0.41(2) d PD 2 
C4' C 0.6168(17) 1.0777(17) 0.1540(9) 0.042(7) Uiso 0.41(2) d PD 2 
C5' C 0.6714(16) 1.0158(17) 0.1707(10) 0.035(7) Uiso 0.41(2) d PD 2 
C6' C 0.6503(12) 0.9493(12) 0.2014(9) 0.043(7) Uiso 0.59(2) d PD 2 
C7 C 0.5465(6) 0.9035(5) 0.2893(4) 0.040(2) Uani 1 d . . 
C8 C 0.5732(8) 0.9879(6) 0.3088(4) 0.060(3) Uani 1 d . . 
C9 C 0.6026(13) 0.9850(12) 0.3661(7) 0.051(7) Uiso 0.55(4) d PD 1 
C10 C 0.5529(17) 0.9383(13) 0.3922(7) 0.045(6) Uiso 0.55(4) d PD 1 
C9' C 0.5493(19) 1.0073(17) 0.3563(10) 0.066(10) Uiso 0.45(4) d PD 2 
C1O' C 0.5200(19) 0.9517(15) 0.3874(8) 0.041(7) Uiso 0.45(4) d PD 2 
C11 C 0.5192(7) 0.8608(6) 0.3679(4) 0.051(3) Uani 1 d . . 
C12 C 0.4853(19) 0.8195(17) 0.4458(8) 0.066(9) Uiso 0.58(3) d PD 1 
C13 C 0.4206(16) 0.8611(23) 0.4584(9) 0.096(10) Uiso 0.58(3) d PD 1 
C14 C 0.4188(15) 0.8689(18) 0.5117(9) 0.081(9) Uiso 0.58(3) d PD 1 
C15 C 0.4775(26) 0.8394(23) 0.5434(10) 0.104(11) Uiso 0.58(3) d PD 1 
C16 C 0.5427(22) 0.7990(18) 0.5332(9) 0.093(10) Uiso 0.58(3) d PD 1 
C17 C 0.5477(18) 0.7870(14) 0.4802(7) 0.066(7) Uiso 0.58(3) d PD 1 
C12' C 0.5117(17) 0.8083(15) 0.4503(7) 0.026(7) Uiso 0.42(3) d PD 2 
C13' C 0.4400(18) 0.8229(26) 0.4683(11) 0.077(11) Uiso 0.42(3) d PD 2 
C14' C 0.4457(21) 0.8234(32) 0.5224(12) 0.101(15) Uiso 0.42(3) d PD 2 
C15' C 0.5159(25) 0.8252(24) 0.5501(10) 0.073(11) Uiso 0.42(3) d PD 2 
C16' C 0.5882(22) 0.8164(24) 0.5342(10) 0.086(12) Uiso 0.42(3) d PD 2 
C17' C 0.5864(20) 0.8056(23) 0.4806(10) 0.075(11) Uiso 0.42(3) d PD 2 
C18 C 0.4169(15) 0.9078(19) 0.0631(8) 0.041(9) Uiso 0.51(5) d PD 1 
C19 C 0.3954(17) 0.9898(20) 0.0632(10) 0.058(9) Uiso 0.51(5) d PD 1 
C20 C 0.3829(13) 1.0364(16) 0.0183(9) 0.042(8) Uiso 0.51(5) d PD 1 
C21 C 0.3903(13) 0.9951(19) -0.0237(8) 0.047(8) Uiso 0.51(5) d PD 1 
C22 C 0.4179(16) 0.9119(21) -0.0236(8) 0.056(8) Uiso 0.51(5) d PD 1 
C23 C 0.4302(19) 0.8658(21) 0.0209(9) 0.067(10) Uiso 0.51(5) d PD 1 
C18' C 0.4157(14) 0.9292(18) 0.0694(8) 0.033(8) Uiso 0.49(5) d PD 2 
C19' C 0.3941(20) 1.0110(21) 0.0750(12) 0.071(11) Uiso 0.49(5) d PD 2 
C20' C 0.3773(20) 1.0625(20) 0.0319(13) 0.085(12) Uiso 0.49(5) d PD 2 
C21' C 0.3860(18) 1.0269(23) -0.0115(11) 0.071(10) Uiso 0.49(5) d PD 2 
C22' C 0.4048(18) 0.9429(24) -0.0178(8) 0.063(9) Uiso 0.49(5) d PD 2 
C23' C 0.4194(14) 0.8916(18) 0.0248(7) 0.036(7) Uiso 0.49(5) d PD 2 
C24 C 0.3810(6) 0.8619(7) 0.1411(4) 0.052(3) Uani 1 d . . 
C25 C 0.2958(7) 0.8909(10) 0.1279(5) 0.075(4) Uani 1 d . . 
H25A H 0.2921(7) 0.9465(10) 0.1394(5) 0.090 Uiso 1 calc R . 
H25B H 0.2816(7) 0.8910(10) 0.0922(5) 0.090 Uiso 1 calc R . 
C26 C 0.2392(8) 0.8411(13) 0.1491(6) 0.114(7) Uani 1 d . . 
H26A H 0.2355(8) 0.7881(13) 0.1333(6) 0.137 Uiso 1 calc R . 
H26B H 0.1868(8) 0.8663(13) 0.1431(6) 0.137 Uiso 1 calc R . 
C27 C 0.2642(7) 0.8307(8) 0.2040(4) 0.063(3) Uani 1 d . . 
H27A H 0.2539(7) 0.8809(8) 0.2207(4) 0.076 Uiso 1 calc R . 
H27B H 0.2322(7) 0.7881(8) 0.2159(4) 0.076 Uiso 1 calc R . 
C28 C 0.3510(6) 0.8092(6) 0.2170(4) 0.042(2) Uani 1 d . . 
C29 C 0.3258(16) 0.7751(19) 0.2982(11) 0.049(11) Uiso 0.50(4) d PD 1 
C30 C 0.2845(13) 0.7007(15) 0.3034(11) 0.050(7) Uiso 0.50(4) d PD 1 
C31 C 0.2291(14) 0.6952(19) 0.3392(13) 0.059(8) Uiso 0.50(4) d PD 1 
C32 C 0.2212(20) 0.7724(28) 0.3656(12) 0.100(12) Uiso 0.50(4) d PD 1 
C33 C 0.2577(19) 0.8445(24) 0.3598(12) 0.100(12) Uiso 0.50(4) d PD 1 
C34 C 0.3121(16) 0.8475(22) 0.3236(11) 0.076(10) Uiso 0.50(4) d PD 1 
C29' C 0.3219(15) 0.7582(17) 0.2909(10) 0.041(10) Uiso 0.50(4) d PD 2 
C30' C 0.2795(14) 0.6831(14) 0.2832(12) 0.059(8) Uiso 0.50(4) d PD 2 
C31' C 0.2254(15) 0.6630(18) 0.3176(12) 0.072(9) Uiso 0.50(4) d PD 2 
C32' C 0.2216(14) 0.7233(22) 0.3579(10) 0.061(9) Uiso 0.50(4) d PD 2 
C33' C 0.2611(16) 0.7950(22) 0.3645(9) 0.075(9) Uiso 0.50(4) d PD 2 
C34' C 0.3164(13) 0.8115(21) 0.3306(8) 0.056(8) Uiso 0.50(4) d PD 2 
C35 C 0.4756(16) 0.6433(14) 0.1373(8) 0.034(8) Uiso 0.54(4) d PD 1 
C36 C 0.4152(21) 0.6709(18) 0.1008(8) 0.069(10) Uiso 0.54(4) d PD 1 
C37 C 0.4240(19) 0.6509(15) 0.0514(7) 0.057(7) Uiso 0.54(4) d PD 1 
C38 C 0.4829(20) 0.6050(15) 0.0402(9) 0.061(8) Uiso 0.54(4) d PD 1 
C39 C 0.5457(16) 0.5741(12) 0.0759(10) 0.036(6) Uiso 0.54(4) d PD 1 
C40 C 0.5428(13) 0.5961(11) 0.1275(8) 0.031(6) Uiso 0.54(4) d PD 1 
C35' C 0.4935(17) 0.6345(15) 0.1454(9) 0.030(9) Uiso 0.46(4) d PD 2 
C36' C 0.4395(19) 0.6595(16) 0.1045(7) 0.036(8) Uiso 0.46(4) d PD 2 
C37' C 0.4559(21) 0.6364(17) 0.0572(8) 0.055(8) Uiso 0.46(4) d PD 2 
C38' C 0.5166(19) 0.5895(15) 0.0523(10) 0.037(8) Uiso 0.46(4) d PD 2 
C39' C 0.5759(19) 0.5626(15) 0.0929(11) 0.048(8) Uiso 0.46(4) d PD 2 
C40' C 0.5637(17) 0.5855(17) 0.1432(11) 0.055(9) Uiso 0.46(4) d PD 2 
C41 C 0.4584(5) 0.6071(6) 0.2214(3) 0.037(2) Uani 1 d . . 
C42 C 0.4326(6) 0.5224(6) 0.2032(4) 0.051(3) Uani 1 d . . 
H42A H 0.4080(6) 0.5253(6) 0.1689(4) 0.061 Uiso 1 calc R . 
H42B H 0.4794(6) 0.4876(6) 0.2051(4) 0.061 Uiso 1 calc R . 
C43 C 0.3742(6) 0.4855(7) 0.2336(4) 0.052(3) Uani 1 d . . 
H43A H 0.3247(6) 0.5163(7) 0.2288(4) 0.063 Uiso 1 calc R . 
H43B H 0.3622(6) 0.4300(7) 0.2231(4) 0.063 Uiso 1 calc R . 
C44 C 0.4093(6) 0.4867(6) 0.2868(4) 0.051(3) Uani 1 d . . 
H44A H 0.4534(6) 0.4485(6) 0.2923(4) 0.061 Uiso 1 calc R . 
H44B H 0.3692(6) 0.4690(6) 0.3065(4) 0.061 Uiso 1 calc R . 
C45 C 0.4389(5) 0.5704(6) 0.3038(4) 0.041(2) Uani 1 d . . 
C46 C 0.4307(6) 0.5356(6) 0.3874(4) 0.050(3) Uani 1 d . . 
C47 C 0.4789(6) 0.4683(7) 0.3981(5) 0.061(3) Uani 1 d . . 
H47A H 0.5193(6) 0.4572(7) 0.3795(5) 0.073 Uiso 1 calc R . 
C48 C 0.4667(7) 0.4165(8) 0.4374(5) 0.071(4) Uani 1 d . . 
H48A H 0.4984(7) 0.3705(8) 0.4444(5) 0.085 Uiso 1 calc R . 
C49 C 0.4084(8) 0.4343(9) 0.4648(5) 0.075(4) Uani 1 d . . 
H49A H 0.4001(8) 0.4001(9) 0.4907(5) 0.090 Uiso 1 calc R . 
C50 C 0.3614(8) 0.5026(7) 0.4546(4) 0.059(3) Uani 1 d . . 
H50A H 0.3216(8) 0.5140(7) 0.4737(4) 0.071 Uiso 1 calc R . 
C51 C 0.3723(7) 0.5534(7) 0.4169(4) 0.055(3) Uani 1 d . . 
H51A H 0.3410(7) 0.5998(7) 0.4108(4) 0.066 Uiso 1 calc R . 
C52 C 0.6496(6) 0.6921(7) 0.3399(4) 0.049(3) Uani 1 d . . 
C53 C 0.6380(6) 0.6139(8) 0.3574(5) 0.062(3) Uani 1 d . . 
H53A H 0.6080(6) 0.5756(8) 0.3376(5) 0.074 Uiso 1 calc R . 
C54 C 0.6730(8) 0.5951(10) 0.4056(5) 0.078(4) Uani 1 d . . 
H54A H 0.6654(8) 0.5435(10) 0.4181(5) 0.093 Uiso 1 calc R . 
C55 C 0.7171(9) 0.6491(11) 0.4342(5) 0.084(4) Uani 1 d . . 
H55A H 0.7399(9) 0.6350(11) 0.4661(5) 0.101 Uiso 1 calc R . 
C56 C 0.7291(9) 0.7279(10) 0.4157(5) 0.084(4) Uani 1 d . . 
H56A H 0.7606(9) 0.7656(10) 0.4352(5) 0.101 Uiso 1 calc R . 
C57 C 0.6941(7) 0.7481(8) 0.3693(4) 0.064(3) Uani 1 d . . 
H57A H 0.7003(7) 0.8004(8) 0.3575(4) 0.077 Uiso 1 calc R . 
C58 C 0.6575(6) 0.7179(5) 0.2570(3) 0.036(2) Uani 1 d . . 
C59 C 0.7457(6) 0.6936(7) 0.2671(4) 0.054(3) Uani 1 d . . 
H59A H 0.7787(6) 0.7415(7) 0.2749(4) 0.065 Uiso 1 calc R . 
H59B H 0.7547(6) 0.6569(7) 0.2952(4) 0.065 Uiso 1 calc R . 
C60 C 0.7682(7) 0.6522(7) 0.2218(4) 0.060(3) Uani 1 d . . 
H60A H 0.7368(7) 0.6030(7) 0.2149(4) 0.071 Uiso 1 calc R . 
H60B H 0.8243(7) 0.6370(7) 0.2277(4) 0.071 Uiso 1 calc R . 
C61 C 0.7532(6) 0.7090(7) 0.1776(4) 0.055(3) Uani 1 d . . 
H61A H 0.7582(6) 0.6788(7) 0.1477(4) 0.066 Uiso 1 calc R . 
H61B H 0.7932(6) 0.7517(7) 0.1812(4) 0.066 Uiso 1 calc R . 
C62 C 0.6703(6) 0.7469(5) 0.1728(4) 0.039(2) Uani 1 d . . 
C63 C 0.6828(24) 0.7910(25) 0.0896(12) 0.045(18) Uiso 0.48(12) d PD 1 
C64 C 0.7516(19) 0.8390(19) 0.0924(15) 0.038(13) Uiso 0.48(12) d PD 1 
C65 C 0.7921(22) 0.8411(23) 0.0511(17) 0.062(15) Uiso 0.48(12) d PD 1 
C66 C 0.7659(27) 0.7974(18) 0.0093(14) 0.051(12) Uiso 0.48(12) d PD 1 
C67 C 0.6968(30) 0.7539(14) 0.0056(10) 0.041(11) Uiso 0.48(12) d PD 1 
C68 C 0.6510(31) 0.7524(23) 0.0458(12) 0.057(11) Uiso 0.48(12) d PD 1 
C63' C 0.6921(21) 0.7863(21) 0.0944(11) 0.038(15) Uiso 0.52(12) d PD 2 
C64' C 0.7585(22) 0.8387(24) 0.1012(15) 0.066(17) Uiso 0.52(12) d PD 2 
C65' C 0.8010(18) 0.8482(19) 0.0611(15) 0.047(12) Uiso 0.52(12) d PD 2 
C66' C 0.7854(27) 0.8035(17) 0.0189(14) 0.053(11) Uiso 0.52(12) d PD 2 
C67' C 0.7235(37) 0.7485(18) 0.0131(13) 0.067(11) Uiso 0.52(12) d PD 2 
C68' C 0.6720(27) 0.7440(15) 0.0504(9) 0.039(9) Uiso 0.52(12) d PD 2 
Cl3 Cl 0.7983(6) 0.9247(8) 0.3313(6) 0.102(3) Uiso 0.57(3) d PD 1 
Cu6 Cu 0.8445(12) 0.9212(13) 0.2679(6) 0.084(3) Uani 0.57(3) d PD 1 
Cl4 Cl 0.8886(5) 0.9171(6) 0.1999(6) 0.096(3) Uiso 0.57(3) d PD 1 
Cl3' Cl 0.7939(6) 0.9476(9) 0.3487(6) 0.079(4) Uiso 0.43(3) d PD 2 
Cu6' Cu 0.8395(14) 0.9276(17) 0.2832(8) 0.083(4) Uani 0.43(3) d PD 2 
Cl4' Cl 0.8861(6) 0.9061(7) 0.2185(7) 0.086(4) Uiso 0.43(3) d PD 2 
Cl1 Cl 0.2427(8) 0.6320(9) 0.1341(4) 0.124(4) Uiso 0.49(2) d PD 1 
Cu5 Cu 0.1782(7) 0.5802(7) 0.1796(5) 0.146(5) Uani 0.49(2) d PD 1 
Cl2 Cl 0.1285(8) 0.5100(8) 0.2293(6) 0.139(5) Uiso 0.49(2) d PD 1 
Cl1' Cl 0.2134(15) 0.5894(17) 0.1332(7) 0.222(9) Uiso 0.51(2) d PD 2 
Cu5' Cu 0.1801(7) 0.5678(7) 0.1965(5) 0.119(4) Uani 0.51(2) d PD 2 
Cl2' Cl 0.1534(7) 0.5257(7) 0.2652(5) 0.127(5) Uiso 0.51(2) d PD 2 
C1S C 1.2695(35) 1.0966(23) 0.4822(14) 0.188(16) Uiso 0.471(11) d PD 1 
Cl5 Cl 1.2241(9) 1.0750(11) 0.5350(5) 0.145(3) Uiso 0.471(11) d PD 1 
Cl6 Cl 1.2743(22) 0.9937(24) 0.4643(12) 0.353(11) Uiso 0.471(11) d PD 1 
C1S' C 1.2411(29) 0.9303(17) 0.5010(15) 0.188(16) Uiso 0.529(11) d PD 2 
Cl5' Cl 1.2397(8) 1.0289(10) 0.5269(5) 0.145(3) Uiso 0.529(11) d PD 2 
Cl6' Cl 1.1671(20) 0.9490(20) 0.4493(11) 0.353(11) Uiso 0.529(11) d PD 2 
C2S C 0.9813(13) 0.8500(15) 0.3932(10) 0.113(11) Uiso 0.541(13) d PD 1 
Cl7 Cl 0.9658(10) 0.7618(9) 0.4281(6) 0.158(6) Uiso 0.541(13) d PD 1 
Cl8 Cl 1.0748(7) 0.8961(8) 0.4128(5) 0.154(5) Uiso 0.541(13) d PD 1 
C2S' C 0.9435(16) 0.8117(33) 0.3860(14) 0.164(20) Uiso 0.459(13) d PD 2 
Cl7' Cl 0.9992(11) 0.7519(9) 0.4330(5) 0.130(5) Uiso 0.459(13) d PD 2 
Cl8' Cl 1.0153(13) 0.8327(13) 0.3467(7) 0.214(10) Uiso 0.459(13) d PD 2 
C4S C 1.0222(73) 0.6630(13) 0.2170(24) 0.448(67) Uiso 0.560(13) d PD 1 
Cl11 Cl 0.9869(12) 0.7075(13) 0.2685(7) 0.245(9) Uiso 0.560(13) d PD 1 
Cl12 Cl 1.0403(8) 0.7479(9) 0.1806(5) 0.164(5) Uiso 0.560(13) d PD 1 
C4S' C 1.0602(25) 0.7029(102) 0.1873(43) 0.448(67) Uiso 0.440(13) d PD 2 
Cl'1 Cl 0.9567(9) 0.7100(10) 0.1649(6) 0.155(7) Uiso 0.440(13) d PD 2 
Cl'2 Cl 1.0734(12) 0.7635(13) 0.2413(8) 0.207(9) Uiso 0.440(13) d PD 2 
O1S O 0.7509(30) 0.7904(36) 0.5309(19) 0.488(29) Uiso 1 d . . 
 
loop_ 
 _atom_site_aniso_label 
 _atom_site_aniso_U_11 
 _atom_site_aniso_U_22 
 _atom_site_aniso_U_33 
 _atom_site_aniso_U_23 
 _atom_site_aniso_U_13 
 _atom_site_aniso_U_12 
Cu1 0.0373(6) 0.0317(6) 0.0273(6) 0.0001(5) 0.0037(5) 0.0051(5) 
Cu2 0.0433(7) 0.0292(6) 0.0290(6) 0.0001(5) 0.0048(5) -0.0021(5) 
Cu3 0.0735(9) 0.0404(7) 0.0328(7) 0.0018(5) 0.0120(6) -0.0151(6) 
Cu4 0.0431(7) 0.0534(8) 0.0301(6) 0.0063(5) 0.0060(5) 0.0072(6) 
N1 0.047(5) 0.032(4) 0.032(4) -0.001(3) 0.010(3) 0.005(3) 
N2 0.064(5) 0.024(4) 0.032(4) -0.001(3) 0.011(4) -0.010(4) 
N3 0.082(7) 0.051(6) 0.037(5) -0.006(4) 0.018(5) -0.014(5) 
N4 0.051(5) 0.040(5) 0.026(4) -0.001(3) 0.014(4) 0.009(4) 
N5 0.039(4) 0.050(5) 0.031(4) 0.009(4) 0.004(4) 0.014(4) 
N6 0.056(5) 0.062(6) 0.031(4) 0.010(4) 0.011(4) 0.011(4) 
N7 0.046(5) 0.031(4) 0.034(4) -0.007(4) 0.007(4) 0.009(4) 
N8 0.042(4) 0.030(4) 0.037(4) -0.003(4) 0.007(3) -0.003(3) 
N9 0.048(5) 0.035(4) 0.033(5) -0.003(4) 0.004(4) -0.004(4) 
N10 0.037(4) 0.035(4) 0.037(5) 0.006(4) -0.002(4) -0.007(3) 
N11 0.038(4) 0.029(4) 0.032(4) 0.002(3) 0.011(3) -0.003(3) 
N12 0.038(4) 0.030(4) 0.040(5) -0.001(4) 0.009(4) -0.004(3) 
C7 0.053(6) 0.026(5) 0.042(6) -0.002(4) 0.011(5) -0.001(4) 
C8 0.109(10) 0.031(6) 0.045(6) -0.008(5) 0.030(6) -0.026(6) 
C11 0.075(8) 0.041(6) 0.039(6) -0.011(5) 0.016(5) -0.018(5) 
C24 0.048(6) 0.067(7) 0.040(6) 0.009(5) 0.002(5) 0.021(5) 
C25 0.053(7) 0.117(11) 0.055(7) 0.031(8) 0.006(6) 0.021(7) 
C26 0.061(9) 0.206(21) 0.079(10) 0.054(12) 0.021(8) 0.051(11) 
C27 0.056(7) 0.080(9) 0.056(7) 0.012(6) 0.014(6) 0.026(6) 
C28 0.044(6) 0.042(6) 0.044(6) -0.001(5) 0.014(5) 0.011(5) 
C41 0.036(5) 0.031(5) 0.041(6) -0.012(5) 0.000(4) 0.002(4) 
C42 0.050(6) 0.041(6) 0.065(7) -0.009(5) 0.013(5) -0.007(5) 
C43 0.051(6) 0.045(6) 0.061(7) -0.012(5) 0.007(5) -0.010(5) 
C44 0.048(6) 0.043(6) 0.061(7) -0.005(5) 0.009(5) -0.019(5) 
C45 0.030(5) 0.034(5) 0.058(7) 0.006(5) 0.006(4) -0.004(4) 
C46 0.045(6) 0.046(6) 0.058(7) 0.009(5) 0.005(5) -0.011(5) 
C47 0.045(6) 0.060(7) 0.082(9) 0.017(7) 0.025(6) 0.004(6) 
C48 0.063(8) 0.062(8) 0.086(9) 0.040(7) 0.008(7) 0.002(6) 
C49 0.071(8) 0.085(10) 0.070(8) 0.045(8) 0.013(7) -0.019(7) 
C50 0.079(8) 0.054(7) 0.047(6) 0.001(6) 0.020(6) -0.019(6) 
C51 0.064(7) 0.044(6) 0.058(7) -0.003(6) 0.014(6) -0.002(5) 
C52 0.055(6) 0.050(6) 0.045(6) 0.013(5) 0.012(5) -0.001(5) 
C53 0.044(6) 0.070(8) 0.070(8) 0.025(7) 0.004(6) -0.006(6) 
C54 0.067(8) 0.101(11) 0.068(9) 0.058(9) 0.024(7) 0.019(8) 
C55 0.068(9) 0.132(14) 0.050(8) 0.016(9) 0.000(7) 0.016(9) 
C56 0.088(10) 0.106(12) 0.052(8) -0.004(8) -0.010(7) -0.016(9) 
C57 0.072(8) 0.069(8) 0.047(7) 0.003(6) -0.008(6) -0.013(6) 
C58 0.043(5) 0.027(5) 0.034(5) 0.004(4) -0.004(5) -0.005(4) 
C59 0.045(6) 0.052(7) 0.063(7) 0.015(6) 0.000(5) 0.009(5) 
C60 0.052(7) 0.054(7) 0.071(8) -0.001(6) 0.003(6) 0.013(5) 
C61 0.052(6) 0.057(7) 0.060(7) 0.007(6) 0.021(5) 0.019(5) 
C62 0.042(5) 0.024(5) 0.048(6) -0.001(4) 0.003(5) -0.002(4) 
Cu6 0.070(4) 0.068(5) 0.113(7) 0.011(5) 0.005(4) -0.017(3) 
Cu6' 0.055(4) 0.064(4) 0.124(10) 0.010(8) -0.007(6) -0.004(3) 
Cu5 0.079(6) 0.137(8) 0.238(11) -0.117(8) 0.069(6) -0.041(5) 
Cu5' 0.061(4) 0.085(4) 0.205(8) 0.021(5) -0.005(4) 0.009(3) 
 
_geom_special_details 
; 
 All esds (except the esd in the dihedral angle between two l.s. planes) 
 are estimated using the full covariance matrix.  The cell esds are taken 
 into account individually in the estimation of esds in distances, angles 
 and torsion angles; correlations between esds in cell parameters are only 
 used when they are defined by crystal symmetry.  An approximate (isotropic) 
 treatment of cell esds is used for estimating esds involving l.s. planes. 
; 
 
loop_ 
 _geom_bond_atom_site_label_1 
 _geom_bond_atom_site_label_2 
 _geom_bond_distance 
 _geom_bond_site_symmetry_2 
 _geom_bond_publ_flag 
Cu1 N5 1.974(7) . y 
Cu1 N11 1.988(7) . y 
Cu1 N7 2.052(8) . y 
Cu1 N1 2.059(8) . y 
Cu1 Cu2 2.479(2) . y 
Cu1 Cu4 2.525(2) . y 
Cu2 N2 1.982(7) . y
Cu2 N8 1.986(7) . y 
Cu2 N4 2.045(8) . y 
Cu2 N10 2.072(8) . y 
Cu2 Cu3 2.518(2) . y 
Cu3 N3 1.844(9) . y 
Cu3 N9 1.865(8) . y 
Cu4 N6 1.852(8) . y 
Cu4 N12 1.871(7) . y 
N1 C7 1.294(12) . ? 
N1 C1 1.42(2) . ? 
N1 C1' 1.49(2) . ? 
N2 C11 1.336(12) . ? 
N2 C7 1.380(12) . ? 
N3 C11 1.330(13) . ? 
N3 C12 1.45(2) . ? 
N3 C12' 1.47(2) . ? 
N4 C28 1.327(12) . ? 
N4 C29' 1.39(2) . ? 
N4 C29 1.46(2) . ? 
N5 C28 1.360(12) . ? 
N5 C24 1.370(12) . ? 
N6 C24 1.326(13) . ? 
N6 C18 1.44(2) . ? 
N6 C18' 1.48(2) . ? 
N7 C41 1.296(12) . ? 
N7 C35' 1.40(2) . ? 
N7 C35 1.51(2) . ? 
N8 C41 1.366(12) . ? 
N8 C45 1.373(12) . ? 
N9 C45 1.287(13) . ? 
N9 C46 1.449(13) . ? 
N10 C58 1.276(12) . ? 
N10 C52 1.453(13) . ? 
N11 C62 1.359(12) . ? 
N11 C58 1.362(11) . ? 
N12 C62 1.311(12) . ? 
N12 C63' 1.43(2) . ? 
N12 C63 1.44(2) . ? 
C1 C2 1.40(2) . ? 
C1 C6 1.41(2) . ? 
C2 C3 1.40(2) . ? 
C3 C4 1.39(3) . ? 
C4 C5 1.39(3) . ? 
C5 C6 1.45(3) . ? 
C1' C2' 1.40(2) . ? 
C1' C6' 1.41(2) . ? 
C2' C3' 1.41(2) . ? 
C3' C4' 1.38(3) . ? 
C4' C5' 1.40(3) . ? 
C5' C6' 1.45(3) . ? 
C7 C8 1.529(14) . ? 
C8 C9' 1.45(3) . ? 
C8 C9 1.57(2) . ? 
C9 C10 1.41(2) . ? 
C10 C11 1.51(2) . ? 
C9' C1O' 1.39(3) . ? 
C1O' C11 1.59(3) . ? 
C12 C13 1.38(3) . ? 
C12 C17 1.41(3) . ? 
C13 C14 1.47(3) . ? 
C14 C15 1.31(4) . ? 
C15 C16 1.35(4) . ? 
C16 C17 1.48(3) . ? 
C12' C13' 1.40(3) . ? 
C12' C17' 1.40(3) . ? 
C13' C14' 1.47(3) . ? 
C14' C15' 1.31(4) . ? 
C15' C16' 1.36(4) . ? 
C16' C17' 1.47(3) . ? 
C18 C23 1.39(3) . ? 
C18 C19 1.40(3) . ? 
C19 C20 1.44(2) . ? 
C20 C21 1.36(3) . ? 
C21 C22 1.44(3) . ? 
C22 C23 1.42(2) . ? 
C18' C23' 1.38(3) . ? 
C18' C19' 1.41(3) . ? 
C19' C20' 1.44(2) . ? 
C20' C21' 1.35(4) . ? 
C21' C22' 1.43(4) . ? 
C22' C23' 1.43(2) . ? 
C24 C25 1.509(15) . ? 
C25 C26 1.44(2) . ? 
C26 C27 1.51(2) . ? 
C27 C28 1.499(14) . ? 
C29 C34 1.41(3) . ? 
C29 C30 1.43(3) . ? 
C30 C31 1.46(3) . ? 
C31 C32 1.47(4) . ? 
C32 C33 1.36(4) . ? 
C33 C34 1.45(3) . ? 
C29' C34' 1.41(3) . ? 
C29' C30' 1.43(3) . ? 
C30' C31' 1.44(3) . ? 
C31' C32' 1.49(4) . ? 
C32' C33' 1.35(4) . ? 
C33' C34' 1.44(3) . ? 
C35 C36 1.39(3) . ? 
C35 C40 1.44(2) . ? 
C36 C37 1.42(2) . ? 
C37 C38 1.32(3) . ? 
C38 C39 1.43(3) . ? 
C39 C40 1.46(2) . ? 
C35' C36' 1.40(3) . ? 
C35' C40' 1.44(3) . ? 
C36' C37' 1.42(2) . ? 
C37' C38' 1.31(3) . ? 
C38' C39' 1.45(3) . ? 
C39' C40' 1.47(3) . ? 
C41 C42 1.520(13) . ? 
C42 C43 1.509(15) . ? 
C43 C44 1.488(15) . ? 
C44 C45 1.513(14) . ? 
C46 C47 1.38(2) . ? 
C46 C51 1.395(15) . ? 
C47 C48 1.41(2) . ? 
C48 C49 1.35(2) . ? 
C49 C50 1.38(2) . ? 
C50 C51 1.36(2) . ? 
C52 C57 1.37(2) . ? 
C52 C53 1.39(2) . ? 
C53 C54 1.40(2) . ? 
C54 C55 1.34(2) . ? 
C55 C56 1.41(2) . ? 
C56 C57 1.36(2) . ? 
C58 C59 1.529(14) . ? 
C59 C60 1.51(2) . ? 
C60 C61 1.52(2) . ? 
C61 C62 1.522(14) . ? 
C63 C68 1.39(2) . ? 
C63 C64 1.40(2) . ? 
C64 C65 1.40(3) . ? 
C65 C66 1.37(3) . ? 
C66 C67 1.36(3) . ? 
C67 C68 1.43(2) . ? 
C63' C68' 1.39(2) . ? 
C63' C64' 1.40(2) . ? 
C64' C65' 1.41(2) . ? 
C65' C66' 1.36(3) . ? 
C66' C67' 1.37(3) . ? 
C67' C68' 1.44(2) . ? 
Cl3 Cu6 2.007(12) . y 
Cu6 Cl4 2.104(13) . y 
Cl3' Cu6' 2.08(2) . ? 
Cu6' Cl4' 2.071(14) . ? 
Cl1 Cu5 1.965(15) . y 
Cu5 Cl2 2.06(2) . y 
Cl1' Cu5' 1.93(2) . ? 
Cu5' Cl2' 2.112(14) . ? 
C1S Cl6 1.765(10) . ? 
C1S Cl5 1.768(10) . ? 
C1S O1S 1.91(7) 3_776 ? 
C1S' Cl5' 1.769(10) . ? 
C1S' Cl6' 1.770(10) . ? 
C2S Cl8 1.763(10) . ? 
C2S Cl7 1.776(10) . ? 
C2S' Cl8' 1.770(10) . ? 
C2S' Cl7' 1.773(10) . ? 
C4S Cl12 1.766(10) . ? 
C4S Cl11 1.767(10) . ? 
C4S' Cl'2 1.767(10) . ? 
C4S' Cl'1 1.770(10) . ? 
O1S C1S 1.91(6) 3_776 ? 
 
loop_ 
 _geom_angle_atom_site_label_1 
 _geom_angle_atom_site_label_2 
 _geom_angle_atom_site_label_3 
 _geom_angle 
 _geom_angle_site_symmetry_1 
 _geom_angle_site_symmetry_3 
 _geom_angle_publ_flag 
N5 Cu1 N11 169.0(3) . . ? 
N5 Cu1 N7 92.1(3) . . ? 
N11 Cu1 N7 88.9(3) . . ? 
N5 Cu1 N1 91.8(3) . . ? 
N11 Cu1 N1 91.2(3) . . ? 
N7 Cu1 N1 158.8(3) . . ? 
N5 Cu1 Cu2 94.7(2) . . ? 
N11 Cu1 Cu2 96.3(2) . . ? 
N7 Cu1 Cu2 79.4(2) . . ? 
N1 Cu1 Cu2 79.5(2) . . ? 
N5 Cu1 Cu4 85.3(2) . . ? 
N11 Cu1 Cu4 83.8(2) . . ? 
N7 Cu1 Cu4 103.0(2) . . ? 
N1 Cu1 Cu4 98.1(2) . . ? 
Cu2 Cu1 Cu4 177.59(6) . . ? 
N2 Cu2 N8 168.5(3) . . ? 
N2 Cu2 N4 93.1(3) . . ? 
N8 Cu2 N4 88.9(3) . . ? 
N2 Cu2 N10 88.9(3) . . ? 
N8 Cu2 N10 93.3(3) . . ? 
N4 Cu2 N10 158.6(3) . . ? 
N2 Cu2 Cu1 95.7(2) . . ? 
N8 Cu2 Cu1 95.7(2) . . ? 
N4 Cu2 Cu1 80.4(2) . . ? 
N10 Cu2 Cu1 78.2(2) . . ? 
N2 Cu2 Cu3 84.1(2) . . ? 
N8 Cu2 Cu3 84.4(2) . . ? 
N4 Cu2 Cu3 100.7(2) . . ? 
N10 Cu2 Cu3 100.7(2) . . ? 
Cu1 Cu2 Cu3 178.90(6) . . ? 
N3 Cu3 N9 177.3(4) . . ? 
N3 Cu3 Cu2 89.0(3) . . ? 
N9 Cu3 Cu2 88.5(2) . . ? 
N6 Cu4 N12 177.5(3) . . ? 
N6 Cu4 Cu1 87.9(2) . . ? 
N12 Cu4 Cu1 89.6(2) . . ? 
C7 N1 C1 118.9(15) . . ? 
C7 N1 C1' 116.9(20) . . ? 
C7 N1 Cu1 130.7(6) . . ? 
C1 N1 Cu1 110.2(14) . . ? 
C1' N1 Cu1 112.3(19) . . ? 
C11 N2 C7 121.5(8) . . ? 
C11 N2 Cu2 123.5(6) . . ? 
C7 N2 Cu2 115.0(6) . . ? 
C11 N3 C12 118.2(13) . . ? 
C11 N3 C12' 120.3(12) . . ? 
C11 N3 Cu3 125.2(7) . . ? 
C12 N3 Cu3 116.1(12) . . ? 
C12' N3 Cu3 113.5(11) . . ? 
C28 N4 C29' 116.1(14) . . ? 
C28 N4 C29 118.0(15) . . ? 
C28 N4 Cu2 129.9(6) . . ? 
C29' N4 Cu2 113.7(13) . . ? 
C29 N4 Cu2 111.7(14) . . ? 
C28 N5 C24 120.6(8) . . ? 
C28 N5 Cu1 117.1(6) . . ? 
C24 N5 Cu1 122.3(6) . . ? 
C24 N6 C18 122.5(13) . . ? 
C24 N6 C18' 117.0(12) . . ? 
C24 N6 Cu4 126.6(7) . . ? 
C18 N6 Cu4 110.3(11) . . ? 
C18' N6 Cu4 116.1(10) . . ? 
C41 N7 C35' 116.1(13) . . ? 
C41 N7 C35 120.0(11) . . ? 
C41 N7 Cu1 130.8(6) . . ? 
C35' N7 Cu1 112.0(11) . . ? 
C35 N7 Cu1 109.2(10) . . ? 
C41 N8 C45 122.7(8) . . ? 
C41 N8 Cu2 114.7(6) . . ? 
C45 N8 Cu2 122.6(6) . . ? 
C45 N9 C46 120.8(8) . . ? 
C45 N9 Cu3 126.5(7) . . ? 
C46 N9 Cu3 112.7(6) . . ? 
C58 N10 C52 117.1(8) . . ? 
C58 N10 Cu2 131.6(6) . . ? 
C52 N10 Cu2 111.3(6) . . ? 
C62 N11 C58 123.1(8) . . ? 
C62 N11 Cu1 122.9(6) . . ? 
C58 N11 Cu1 114.0(6) . . ? 
C62 N12 C63' 115.2(20) . . ? 
C62 N12 C63 123.3(22) . . ? 
C62 N12 Cu4 123.7(6) . . ? 
C63' N12 Cu4 121.0(19) . . ? 
C63 N12 Cu4 113.0(22) . . ? 
C2 C1 C6 125.5(15) . . ? 
C2 C1 N1 119.4(13) . . ? 
C6 C1 N1 115.1(16) . . ? 
C3 C2 C1 118.5(14) . . ? 
C4 C3 C2 119.2(16) . . ? 
C3 C4 C5 121.3(13) . . ? 
C4 C5 C6 122.3(16) . . ? 
C1 C6 C5 112.8(21) . . ? 
C2' C1' C6' 123.9(18) . . ? 
C2' C1' N1 118.8(18) . . ? 
C6' C1' N1 116.1(18) . . ? 
C1' C2' C3' 117.8(20) . . ? 
C4' C3' C2' 120.4(20) . . ? 
C3' C4' C5' 120.3(17) . . ? 
C4' C5' C6' 121.7(17) . . ? 
C1' C6' C5' 114.2(21) . . ? 
N1 C7 N2 119.0(8) . . ? 
N1 C7 C8 119.9(8) . . ? 
N2 C7 C8 121.1(8) . . ? 
C9' C8 C7 113.7(13) . . ? 
C7 C8 C9 110.6(10) . . ? 
C10 C9 C8 113.4(16) . . ? 
C9 C10 C11 116.9(16) . . ? 
C1O' C9' C8 125.2(23) . . ? 
C9' C1O' C11 113.5(19) . . ? 
N3 C11 N2 118.1(9) . . ? 
N3 C11 C10 119.3(10) . . ? 
N2 C11 C10 121.7(10) . . ? 
N3 C11 C1O' 119.8(11) . . ? 
N2 C11 C1O' 120.4(11) . . ? 
C13 C12 C17 124.3(18) . . ? 
C13 C12 N3 125.9(24) . . ? 
C17 C12 N3 109.7(21) . . ? 
C12 C13 C14 115.4(24) . . ? 
C15 C14 C13 119.9(25) . . ? 
C14 C15 C16 127.4(24) . . ? 
C15 C16 C17 115.8(25) . . ? 
C12 C17 C16 117.2(20) . . ? 
C13' C12' C17' 123.3(19) . . ? 
C13' C12' N3 111.4(22) . . ? 
C17' C12' N3 125.3(20) . . ? 
C12' C13' C14' 115.2(26) . . ? 
C15' C14' C13' 120.0(27) . . ? 
C14' C15' C16' 126.2(25) . . ? 
C15' C16' C17' 116.3(27) . . ? 
C12' C17' C16' 117.9(23) . . ? 
C23 C18 C19 123.6(18) . . ? 
C23 C18 N6 121.1(21) . . ? 
C19 C18 N6 114.7(21) . . ? 
C18 C19 C20 121.2(25) . . ? 
C21 C20 C19 116.0(23) . . ? 
C20 C21 C22 122.8(17) . . ? 
C23 C22 C21 120.7(22) . . ? 
C18 C23 C22 115.2(24) . . ? 
C23' C18' C19' 124.8(18) . . ? 
C23' C18' N6 111.3(20) . . ? 
C19' C18' N6 123.9(19) . . ? 
C18' C19' C20' 119.6(25) . . ? 
C21' C20' C19' 115.5(26) . . ? 
C20' C21' C22' 125.2(20) . . ? 
C23' C22' C21' 119.1(22) . . ? 
C18' C23' C22' 115.6(23) . . ? 
N6 C24 N5 117.5(9) . . ? 
N6 C24 C25 122.7(9) . . ? 
N5 C24 C25 119.8(9) . . ? 
C26 C25 C24 113.0(11) . . ? 
C25 C26 C27 111.0(14) . . ? 
C28 C27 C26 112.5(9) . . ? 
N4 C28 N5 117.7(8) . . ? 
N4 C28 C27 120.6(9) . . ? 
N5 C28 C27 121.7(9) . . ? 
C34 C29 C30 123.6(19) . . ? 
C34 C29 N4 119.3(20) . . ? 
C30 C29 N4 116.8(23) . . ? 
C29 C30 C31 119.6(23) . . ? 
C30 C31 C32 113.0(20) . . ? 
C33 C32 C31 128.1(23) . . ? 
C32 C33 C34 117.2(27) . . ? 
C29 C34 C33 118.3(25) . . ? 
N4 C29' C34' 116.6(20) . . ? 
N4 C29' C30' 118.9(22) . . ? 
C34' C29' C30' 124.1(18) . . ? 
C29' C30' C31' 117.1(23) . . ? 
C30' C31' C32' 115.6(21) . . ? 
C33' C32' C31' 127.0(21) . . ? 
C32' C33' C34' 115.8(26) . . ? 
C29' C34' C33' 120.3(23) . . ? 
C36 C35 C40 123.9(17) . . ? 
C36 C35 N7 123.6(16) . . ? 
C40 C35 N7 112.4(19) . . ? 
C35 C36 C37 116.0(23) . . ? 
C38 C37 C36 122.8(24) . . ? 
C37 C38 C39 123.7(18) . . ? 
C38 C39 C40 116.4(16) . . ? 
C35 C40 C39 117.0(19) . . ? 
N7 C35' C36' 116.4(18) . . ? 
N7 C35' C40' 118.5(21) . . ? 
C36' C35' C40' 125.0(17) . . ? 
C35' C36' C37' 117.5(22) . . ? 
C38' C37' C36' 121.0(25) . . ? 
C37' C38' C39' 124.5(18) . . ? 
C38' C39' C40' 117.5(18) . . ? 
C35' C40' C39' 114.4(22) . . ? 
N7 C41 N8 119.5(8) . . ? 
N7 C41 C42 121.6(8) . . ? 
N8 C41 C42 118.9(9) . . ? 
C43 C42 C41 111.5(9) . . ? 
C44 C43 C42 109.6(9) . . ? 
C43 C44 C45 112.2(9) . . ? 
N9 C45 N8 117.9(8) . . ? 
N9 C45 C44 122.1(9) . . ? 
N8 C45 C44 120.0(9) . . ? 
C47 C46 C51 119.3(10) . . ? 
C47 C46 N9 121.7(10) . . ? 
C51 C46 N9 118.7(9) . . ? 
C46 C47 C48 119.9(11) . . ? 
C49 C48 C47 119.5(11) . . ? 
C48 C49 C50 120.5(11) . . ? 
C51 C50 C49 120.9(11) . . ? 
C50 C51 C46 119.9(11) . . ? 
C57 C52 C53 120.5(11) . . ? 
C57 C52 N10 120.6(9) . . ? 
C53 C52 N10 118.9(10) . . ? 
C52 C53 C54 117.8(13) . . ? 
C55 C54 C53 121.8(13) . . ? 
C54 C55 C56 119.7(12) . . ? 
C57 C56 C55 119.4(13) . . ? 
C56 C57 C52 120.7(13) . . ? 
N10 C58 N11 119.6(8) . . ? 
N10 C58 C59 121.9(8) . . ? 
N11 C58 C59 118.5(8) . . ? 
C60 C59 C58 109.0(9) . . ? 
C59 C60 C61 110.1(9) . . ? 
C60 C61 C62 111.3(9) . . ? 
N12 C62 N11 119.4(8) . . ? 
N12 C62 C61 119.6(9) . . ? 
N11 C62 C61 121.0(9) . . ? 
C68 C63 C64 121.0(17) . . ? 
C68 C63 N12 118.3(20) . . ? 
C64 C63 N12 120.6(20) . . ? 
C63 C64 C65 118.1(21) . . ? 
C66 C65 C64 121.5(20) . . ? 
C67 C66 C65 120.5(16) . . ? 
C66 C67 C68 120.4(17) . . ? 
C63 C68 C67 118.0(19) . . ? 
C68' C63' C64' 120.7(16) . . ? 
C68' C63' N12 120.2(19) . . ? 
C64' C63' N12 118.7(19) . . ? 
C63' C64' C65' 117.0(21) . . ? 
C66' C65' C64' 123.0(19) . . ? 
C65' C66' C67' 120.1(16) . . ? 
C66' C67' C68' 119.0(17) . . ? 
C63' C68' C67' 119.5(18) . . ? 
Cl3 Cu6 Cl4 177.9(12) . . ? 
Cl4' Cu6' Cl3' 179.1(14) . . ? 
Cl1 Cu5 Cl2 168.9(8) . . ? 
Cl1' Cu5' Cl2' 170.6(10) . . ? 
Cl6 C1S Cl5 94.5(15) . . ? 
Cl6 C1S O1S 153.1(35) . 3_776 ? 
Cl5 C1S O1S 105.0(24) . 3_776 ? 
Cl5' C1S' Cl6' 96.4(15) . . ? 
Cl8 C2S Cl7 112.5(12) . . ? 
Cl8' C2S' Cl7' 102.1(12) . . ? 
Cl12 C4S Cl11 103.3(13) . . ? 
Cl'2 C4S' Cl'1 104.3(13) . . ? 
 
_refine_diff_density_max    1.748 
_refine_diff_density_min   -0.935 
_refine_diff_density_rms    0.146 

#===END

data_cmpd_2-0.5H2O
 
_audit_creation_method            SHELXL 
_chemical_name_systematic 
; 
 Bis(2,6-diphenyliminopiperidinato)tricopper(I) bichlorocuperate(I) 
; 
_chemical_formula_moiety          'Cu3 (C17 H16 N3)2 (Cu Cl2), 0.5(H2 O)' 
_chemical_formula_structural      'Cu3 (DPhIP)2 (CuCl2), 0.5(H2 O)' 
_chemical_formula_analytical      'not measured' 
_chemical_formula_sum             'C34 H33 Cl2 Cu4 N6 O0.50' 
_chemical_formula_weight          858.72 
_chemical_melting_point           'not measured' 
_chemical_compound_source         synthesis
 
loop_ 
 _atom_type_symbol 
 _atom_type_description 
 _atom_type_scat_dispersion_real 
 _atom_type_scat_dispersion_imag 
 _atom_type_scat_source 
 'C'  'C'   0.0033   0.0016 
 'International Tables Vol C Tables 4.2.6.8 and 6.1.1.4' 
 'H'  'H'   0.0000   0.0000 
 'International Tables Vol C Tables 4.2.6.8 and 6.1.1.4' 
 'N'  'N'   0.0061   0.0033 
 'International Tables Vol C Tables 4.2.6.8 and 6.1.1.4' 
 'Cu'  'Cu'   0.3201   1.2651 
 'International Tables Vol C Tables 4.2.6.8 and 6.1.1.4' 
 'Cl'  'Cl'   0.1484   0.1585 
 'International Tables Vol C Tables 4.2.6.8 and 6.1.1.4' 
 'O'  'O'   0.0106   0.0060 
 'International Tables Vol C Tables 4.2.6.8 and 6.1.1.4' 
 
_symmetry_cell_setting            monoclinic 
_symmetry_space_group_name_H-M    'P 1 21/n 1' 
 
loop_ 
 _symmetry_equiv_pos_as_xyz 
 'x, y, z' 
 '-x+1/2, y+1/2, -z+1/2' 
 '-x, -y, -z' 
 'x-1/2, -y-1/2, z-1/2' 
 
_cell_length_a                    16.259(4) 
_cell_length_b                    6.147(2) 
_cell_length_c                    16.544(8) 
_cell_angle_alpha                 90.00 
_cell_angle_beta                  93.55(3) 
_cell_angle_gamma                 90.00 
_cell_volume                      1650.3(10) 
_cell_formula_units_Z             2 
_cell_measurement_temperature     213(2) 
_cell_measurement_reflns_used     25 
_cell_measurement_theta_min       10.37 
_cell_measurement_theta_max       14.64 
 
_exptl_crystal_description        plate 
_exptl_crystal_colour             yellow 
_exptl_crystal_size_max           0.48 
_exptl_crystal_size_mid           0.33 
_exptl_crystal_size_min           0.08 
_exptl_crystal_density_meas       'not measured' 
_exptl_crystal_density_diffrn     1.728 
_exptl_crystal_density_method     none 
_exptl_crystal_F_000              866 
_exptl_absorpt_coefficient_mu     2.741 
_exptl_absorpt_correction_type    'empirical, via \y-scans' 
_exptl_absorpt_correction_T_min   0.22 
_exptl_absorpt_correction_T_max   0.49 
 
_exptl_special_details 
; 
 ? 
; 
 
_diffrn_ambient_temperature       213(2) 
_diffrn_radiation_wavelength      0.71073 
_diffrn_radiation_type            MoK\a 
_diffrn_radiation_source          'fine-focus sealed tube' 
_diffrn_radiation_monochromator   graphite 
_diffrn_measurement_device        'Nonius CAD4' 
_diffrn_measurement_method        'Omega-theta scans' 
_diffrn_standards_number          3 
_diffrn_standards_interval_count  250 
_diffrn_standards_interval_time   120 
_diffrn_standards_decay_%         none 
_diffrn_reflns_number             2741 
_diffrn_reflns_av_R_equivalents   0.0562 
_diffrn_reflns_av_sigmaI/netI     0.0421 
_diffrn_reflns_limit_h_min        -19 
_diffrn_reflns_limit_h_max        19 
_diffrn_reflns_limit_k_min        -1 
_diffrn_reflns_limit_k_max        7 
_diffrn_reflns_limit_l_min        0 
_diffrn_reflns_limit_l_max        19 
_diffrn_reflns_theta_min          2.47 
_diffrn_reflns_theta_max          22.50 
_reflns_number_total              2159 
_reflns_number_observed           1644 
_reflns_observed_criterion        >2sigma(I) 
 
_computing_data_collection        'CAD4 V.5 (Enraf-Nonius, 1989)'
_computing_cell_refinement        'CAD4 EXPRESS'
_computing_data_reduction         'XCAD4 (Harms, 1993)'
_computing_structure_solution     'SHELXTL V.5 (Siemens, 1994)'
_computing_structure_refinement   'SHELXL-93 (Sheldrick, 1993)'
_computing_molecular_graphics     'SHELXTL V.5 (Siemens, 1994)'
_computing_publication_material   CIFTAB
 
_refine_special_details 
; 
 Refinement on F^2^ for ALL reflections except for 13 with very negative F^2^ 
 or flagged by the user for potential systematic errors.  Weighted R-factors 
 wR and all goodnesses of fit S are based on F^2^, conventional R-factors R 
 are based on F, with F set to zero for negative F^2^. The observed criterion 
 of F^2^ > 2sigma(F^2^) is used only for calculating _R_factor_obs etc. and is 
 not relevant to the choice of reflections for refinement.  R-factors based 
 on F^2^ are statistically about twice as large as those based on F, and R- 
 factors based on ALL data will be even larger. 
; 
 
_refine_ls_structure_factor_coef  Fsqd  
_refine_ls_matrix_type            full 
_refine_ls_weighting_scheme 
 'calc w=1/[\s^2^(Fo^2^)+(0.1480P)^2^+0.0000P] where P=(Fo^2^+2Fc^2^)/3' 
_atom_sites_solution_primary      direct 
_atom_sites_solution_secondary    difmap 
_atom_sites_solution_hydrogens    geom 
_refine_ls_hydrogen_treatment     noref
_refine_ls_extinction_method      none 
_refine_ls_extinction_coef        ? 
_refine_ls_number_reflns          2146 
_refine_ls_number_parameters      222 
_refine_ls_number_restraints      0 
_refine_ls_R_factor_all           0.0940 
_refine_ls_R_factor_obs           0.0676 
_refine_ls_wR_factor_all          0.2055 
_refine_ls_wR_factor_obs          0.1810 
_refine_ls_goodness_of_fit_all    1.060 
_refine_ls_goodness_of_fit_obs    1.130 
_refine_ls_restrained_S_all       1.106 
_refine_ls_restrained_S_obs       1.130 
_refine_ls_shift/esd_max          0.017 
_refine_ls_shift/esd_mean         0.003 
 
loop_ 
 _atom_site_label 
 _atom_site_type_symbol 
 _atom_site_fract_x 
 _atom_site_fract_y 
 _atom_site_fract_z 
 _atom_site_U_iso_or_equiv 
 _atom_site_thermal_displace_type 
 _atom_site_occupancy 
 _atom_site_calc_flag 
 _atom_site_refinement_flags 
 _atom_site_disorder_group 
Cu1 Cu 0.0000 0.5000 0.5000 0.0476(5) Uani 1 d S . 
Cu2 Cu -0.11528(7) 0.6862(3) 0.55781(7) 0.0427(5) Uani 0.938(4) d P 1 
Cl1 Cl 0.10589(14) 0.8985(4) 0.44048(14) 0.0524(7) Uani 0.938(4) d P 1 
Cu2' Cu -0.1261(13) 0.5805(47) 0.5613(12) 0.0427(5) Uani 0.062(4) d P 2 
Cl1' Cl -0.1045(21) 1.0843(58) 0.4440(22) 0.0524(7) Uani 0.062(4) d P 2 
Cu3 Cu 0.0000 1.0000 0.5000 0.0597(6) Uani 1 d S . 
N1 N 0.1760(4) 0.3818(11) 0.5436(4) 0.042(2) Uani 1 d . . 
N2 N 0.0594(4) 0.4946(11) 0.6030(4) 0.041(2) Uani 1 d . . 
N3 N -0.0552(4) 0.6260(10) 0.6584(4) 0.038(2) Uani 1 d . . 
C1 C 0.2631(4) 0.3503(13) 0.5461(4) 0.038(2) Uani 1 d . . 
C2 C 0.3164(5) 0.5161(14) 0.5658(4) 0.043(2) Uani 1 d . . 
H2A H 0.2960(5) 0.6545(14) 0.5781(4) 0.052 Uiso 1 calc R . 
C3 C 0.4016(5) 0.4798(16) 0.5678(5) 0.053(2) Uani 1 d . . 
H3A H 0.4384(5) 0.5931(16) 0.5825(5) 0.063 Uiso 1 calc R . 
C4 C 0.4317(5) 0.2769(17) 0.5479(5) 0.053(2) Uani 1 d . . 
H4A H 0.4889(5) 0.2527(17) 0.5499(5) 0.064 Uiso 1 calc R . 
C5 C 0.3796(5) 0.1141(17) 0.5258(6) 0.056(2) Uani 1 d . . 
H5A H 0.4005(5) -0.0216(17) 0.5107(6) 0.068 Uiso 1 calc R . 
C6 C 0.2931(5) 0.1478(15) 0.5254(5) 0.047(2) Uani 1 d . . 
H6A H 0.2565(5) 0.0338(15) 0.5111(5) 0.057 Uiso 1 calc R . 
C7 C 0.1420(5) 0.4401(13) 0.6081(5) 0.042(2) Uani 1 d . . 
C8 C 0.1881(5) 0.4590(21) 0.6898(5) 0.070(3) Uani 1 d . . 
H8A H 0.2371(5) 0.3662(21) 0.6910(5) 0.085 Uiso 1 calc R . 
H8B H 0.2063(5) 0.6097(21) 0.6984(5) 0.085 Uiso 1 calc R . 
C9 C 0.1368(6) 0.3950(24) 0.7545(5) 0.084(4) Uani 1 d . . 
H9A H 0.1674(6) 0.4179(24) 0.8067(5) 0.100 Uiso 1 calc R . 
H9B H 0.1244(6) 0.2394(24) 0.7494(5) 0.100 Uiso 1 calc R . 
C10 C 0.0583(5) 0.5185(17) 0.7534(5) 0.060(3) Uani 1 d . . 
H10A H 0.0690(5) 0.6616(17) 0.7780(5) 0.072 Uiso 1 calc R . 
H10B H 0.0198(5) 0.4414(17) 0.7866(5) 0.072 Uiso 1 calc R . 
C11 C 0.0186(5) 0.5492(13) 0.6696(5) 0.043(2) Uani 1 d . . 
C12 C -0.1000(5) 0.6783(14) 0.7294(4) 0.042(2) Uani 1 d . . 
C13 C -0.1534(5) 0.5261(14) 0.7581(5) 0.045(2) Uani 1 d . . 
H13A H -0.1589(5) 0.3890(14) 0.7333(5) 0.054 Uiso 1 calc R . 
C14 C -0.1988(5) 0.5760(18) 0.8235(5) 0.058(3) Uani 1 d . . 
H14A H -0.2359(5) 0.4739(18) 0.8429(5) 0.070 Uiso 1 calc R . 
C15 C -0.1894(5) 0.7747(16) 0.8597(5) 0.050(2) Uani 1 d . . 
H15A H -0.2204(5) 0.8089(16) 0.9041(5) 0.060 Uiso 1 calc R . 
C16 C -0.1363(6) 0.9230(15) 0.8328(5) 0.051(2) Uani 1 d . . 
H16A H -0.1295(6) 1.0577(15) 0.8593(5) 0.061 Uiso 1 calc R . 
C17 C -0.0912(5) 0.8763(13) 0.7652(4) 0.044(2) Uani 1 d . . 
H17A H -0.0555(5) 0.9806(13) 0.7450(4) 0.053 Uiso 1 calc R . 
O1S O -0.1275(29) 0.9916(68) 0.3022(24) 0.130(14) Uiso 0.25 d P . 
 
loop_ 
 _atom_site_aniso_label 
 _atom_site_aniso_U_11 
 _atom_site_aniso_U_22 
 _atom_site_aniso_U_33 
 _atom_site_aniso_U_23 
 _atom_site_aniso_U_13 
 _atom_site_aniso_U_12 
Cu1 0.0273(8) 0.0746(11) 0.0401(8) -0.0057(7) -0.0045(6) 0.0165(7) 
Cu2 0.0227(7) 0.0624(11) 0.0426(7) -0.0045(6) 0.0002(4) 0.0055(7) 
Cl1 0.0378(13) 0.0485(14) 0.071(2) -0.0002(11) 0.0089(11) -0.0079(10) 
Cu2' 0.0227(7) 0.0624(11) 0.0426(7) -0.0045(6) 0.0002(4) 0.0055(7) 
Cl1' 0.0378(13) 0.0485(14) 0.071(2) -0.0002(11) 0.0089(11) -0.0079(10) 
Cu3 0.0394(10) 0.0705(12) 0.0696(11) 0.0037(8) 0.0059(8) -0.0075(8) 
N1 0.024(3) 0.060(5) 0.041(4) -0.005(3) 0.004(3) 0.005(3) 
N2 0.023(3) 0.061(4) 0.040(4) 0.002(3) 0.002(3) 0.008(3) 
N3 0.023(3) 0.047(4) 0.043(4) 0.000(3) 0.002(3) 0.002(3) 
C1 0.027(4) 0.045(5) 0.042(4) 0.008(3) -0.004(3) 0.008(4) 
C2 0.028(4) 0.063(5) 0.039(4) -0.006(4) -0.001(3) 0.000(4) 
C3 0.031(5) 0.075(7) 0.051(5) 0.002(4) -0.004(4) -0.011(4) 
C4 0.022(4) 0.091(7) 0.048(5) 0.019(5) 0.001(4) 0.013(5) 
C5 0.030(5) 0.072(7) 0.067(6) -0.007(5) 0.003(4) 0.013(5) 
C6 0.031(4) 0.060(6) 0.050(5) 0.004(4) -0.006(4) 0.002(4) 
C7 0.023(4) 0.048(5) 0.053(5) 0.002(4) -0.006(4) 0.003(4) 
C8 0.036(5) 0.136(10) 0.039(5) -0.001(5) -0.007(4) 0.017(6) 
C9 0.041(6) 0.168(12) 0.042(5) 0.010(6) -0.001(4) 0.033(7) 
C10 0.042(5) 0.091(7) 0.045(5) 0.006(5) -0.011(4) 0.021(5) 
C11 0.035(5) 0.044(5) 0.049(5) -0.001(4) 0.001(4) -0.001(4) 
C12 0.029(4) 0.058(5) 0.039(4) -0.004(4) -0.008(3) 0.008(4) 
C13 0.031(5) 0.059(5) 0.045(5) -0.004(4) 0.003(4) 0.000(4) 
C14 0.027(5) 0.091(8) 0.057(5) 0.008(5) 0.008(4) -0.004(5) 
C15 0.039(5) 0.075(7) 0.036(4) -0.006(4) 0.003(4) 0.014(5) 
C16 0.048(5) 0.053(5) 0.051(5) -0.002(4) -0.003(4) 0.009(5) 
C17 0.032(5) 0.054(6) 0.046(5) 0.001(4) 0.004(4) -0.002(4) 
 
_geom_special_details 
; 
 All esds (except the esd in the dihedral angle between two l.s. planes) 
 are estimated using the full covariance matrix.  The cell esds are taken 
 into account individually in the estimation of esds in distances, angles 
 and torsion angles; correlations between esds in cell parameters are only 
 used when they are defined by crystal symmetry.  An approximate (isotropic) 
 treatment of cell esds is used for estimating esds involving l.s. planes. 
; 
 
loop_ 
 _geom_bond_atom_site_label_1 
 _geom_bond_atom_site_label_2 
 _geom_bond_distance 
 _geom_bond_site_symmetry_2 
 _geom_bond_publ_flag 
Cu1 N2 1.907(6) 3_566 ? 
Cu1 N2 1.907(6) . y 
Cu1 Cu2' 2.40(2) . y 
Cu1 Cu2' 2.40(2) 3_566 ? 
Cu1 Cu2 2.4414(13) 3_566 ? 
Cu1 Cu2 2.4414(13) . y 
Cu2 N3 1.912(6) . y 
Cu2 N1 1.940(6) 3_566 ? 
Cu2 Cl1 2.557(3) 3_576 y 
Cu2 Cu3 2.893(2) . y 
Cl1 Cu3 2.129(2) . y 
Cl1 Cu2 2.557(3) 3_576 ? 
Cu2' N1 1.89(2) 3_566 ? 
Cu2' N3 1.94(2) . y 
Cl1' Cu3 1.95(4) . y 
Cu3 Cl1' 1.95(4) 3_576 ? 
Cu3 Cl1 2.129(2) 3_576 ? 
Cu3 Cu2 2.893(2) 3_576 ? 
N1 C7 1.283(10) . ? 
N1 C1 1.428(10) . ? 
N1 Cu2' 1.89(2) 3_566 ? 
N1 Cu2 1.940(6) 3_566 ? 
N2 C11 1.363(10) . ? 
N2 C7 1.381(10) . ? 
N3 C11 1.293(10) . ? 
N3 C12 1.456(10) . ? 
C1 C2 1.364(11) . ? 
C1 C6 1.387(12) . ? 
C2 C3 1.402(12) . ? 
C3 C4 1.387(13) . ? 
C4 C5 1.346(13) . ? 
C5 C6 1.421(12) . ? 
C7 C8 1.509(11) . ? 
C8 C9 1.451(13) . ? 
C9 C10 1.483(12) . ? 
C10 C11 1.504(11) . ? 
C12 C17 1.357(12) . ? 
C12 C13 1.381(12) . ? 
C13 C14 1.381(11) . ? 
C14 C15 1.365(13) . ? 
C15 C16 1.350(13) . ? 
C16 C17 1.404(12) . ? 
 
loop_ 
 _geom_angle_atom_site_label_1 
 _geom_angle_atom_site_label_2 
 _geom_angle_atom_site_label_3 
 _geom_angle 
 _geom_angle_site_symmetry_1 
 _geom_angle_site_symmetry_3 
 _geom_angle_publ_flag 
N2 Cu1 N2 179.999(1) 3_566 . ? 
N2 Cu1 Cu2' 88.6(5) 3_566 . ? 
N2 Cu1 Cu2' 91.4(5) . . ? 
N2 Cu1 Cu2' 91.4(5) 3_566 3_566 ? 
N2 Cu1 Cu2' 88.6(5) . 3_566 ? 
Cu2' Cu1 Cu2' 179.999(5) . 3_566 ? 
N2 Cu1 Cu2 91.0(2) 3_566 3_566 ? 
N2 Cu1 Cu2 89.0(2) . 3_566 ? 
N2 Cu1 Cu2 89.0(2) 3_566 . ? 
N2 Cu1 Cu2 91.0(2) . . ? 
Cu2 Cu1 Cu2 180.0 3_566 . ? 
N3 Cu2 N1 156.4(3) . 3_566 ? 
N3 Cu2 Cu1 83.5(2) . . ? 
N1 Cu2 Cu1 85.5(2) 3_566 . ? 
N3 Cu2 Cl1 99.0(2) . 3_576 ? 
N1 Cu2 Cl1 104.6(2) 3_566 3_576 ? 
Cu1 Cu2 Cl1 115.18(8) . 3_576 ? 
N3 Cu2 Cu3 96.3(2) . . ? 
N1 Cu2 Cu3 99.4(2) 3_566 . ? 
Cu1 Cu2 Cu3 69.77(4) . . ? 
Cl1 Cu2 Cu3 45.47(6) 3_576 . ? 
Cu3 Cl1 Cu2 75.63(8) . 3_576 ? 
N1 Cu2' N3 161.0(16) 3_566 . ? 
N1 Cu2' Cu1 88.0(8) 3_566 . ? 
N3 Cu2' Cu1 84.3(8) . . ? 
Cl1' Cu3 Cl1' 179.999(8) . 3_576 ? 
Cl1 Cu3 Cl1 180.0 3_576 . ? 
Cl1 Cu3 Cu2 121.10(7) 3_576 3_576 ? 
Cl1 Cu3 Cu2 58.90(7) . 3_576 ? 
Cl1 Cu3 Cu2 58.90(7) 3_576 . ? 
Cl1 Cu3 Cu2 121.10(7) . . ? 
Cu2 Cu3 Cu2 180.0 3_576 . ? 
C7 N1 C1 119.5(6) . . ? 
C7 N1 Cu2' 123.3(8) . 3_566 ? 
C1 N1 Cu2' 114.3(8) . 3_566 ? 
C7 N1 Cu2 123.9(5) . 3_566 ? 
C1 N1 Cu2 116.5(5) . 3_566 ? 
C11 N2 C7 122.0(7) . . ? 
C11 N2 Cu1 118.3(5) . . ? 
C7 N2 Cu1 119.7(5) . . ? 
C11 N3 C12 118.0(6) . . ? 
C11 N3 Cu2 128.0(5) . . ? 
C12 N3 Cu2 113.9(4) . . ? 
C11 N3 Cu2' 124.5(8) . . ? 
C12 N3 Cu2' 113.5(8) . . ? 
C2 C1 C6 120.2(7) . . ? 
C2 C1 N1 121.3(7) . . ? 
C6 C1 N1 118.6(7) . . ? 
C1 C2 C3 119.9(8) . . ? 
C4 C3 C2 120.0(8) . . ? 
C5 C4 C3 120.5(8) . . ? 
C4 C5 C6 119.9(9) . . ? 
C1 C6 C5 119.5(8) . . ? 
N1 C7 N2 119.0(7) . . ? 
N1 C7 C8 123.4(7) . . ? 
N2 C7 C8 117.6(7) . . ? 
C9 C8 C7 111.3(8) . . ? 
C8 C9 C10 112.7(9) . . ? 
C9 C10 C11 113.2(7) . . ? 
N3 C11 N2 117.9(7) . . ? 
N3 C11 C10 121.4(7) . . ? 
N2 C11 C10 120.8(7) . . ? 
C17 C12 C13 120.6(8) . . ? 
C17 C12 N3 120.4(8) . . ? 
C13 C12 N3 119.0(7) . . ? 
C14 C13 C12 119.8(8) . . ? 
C15 C14 C13 119.4(9) . . ? 
C16 C15 C14 121.1(8) . . ? 
C15 C16 C17 120.0(8) . . ? 
C12 C17 C16 119.0(8) . . ? 
 
_refine_diff_density_max    0.878 
_refine_diff_density_min   -1.195 
_refine_diff_density_rms    0.167 

#===END
 
data_cmpd_2-THF
 
_audit_creation_method            SHELXL 

_chemical_name_common             ? 
_chemical_formula_moiety          'Cu3 (C17 H16 N3)2 (Cu Cl2),(C4 H8 O)' 
_chemical_formula_structural      'Cu3 (DPhIP)2 (CuCl2),THF' 
_chemical_formula_analytical      'not measured' 
_chemical_formula_sum             'C38 H40 Cl2 Cu4 N6 O' 
_chemical_formula_weight          921.82 
_chemical_melting_point           'not measured' 
_chemical_compound_source         symthesis
 
loop_ 
 _atom_type_symbol 
 _atom_type_description 
 _atom_type_scat_dispersion_real 
 _atom_type_scat_dispersion_imag 
 _atom_type_scat_source 
 'C'  'C'   0.0033   0.0016 
 'International Tables Vol C Tables 4.2.6.8 and 6.1.1.4' 
 'H'  'H'   0.0000   0.0000 
 'International Tables Vol C Tables 4.2.6.8 and 6.1.1.4' 
 'N'  'N'   0.0061   0.0033 
 'International Tables Vol C Tables 4.2.6.8 and 6.1.1.4' 
 'Cl'  'Cl'   0.1484   0.1585 
 'International Tables Vol C Tables 4.2.6.8 and 6.1.1.4' 
 'Cu'  'Cu'   0.3201   1.2651 
 'International Tables Vol C Tables 4.2.6.8 and 6.1.1.4' 
 'O'  'O'   0.0106   0.0060 
 'International Tables Vol C Tables 4.2.6.8 and 6.1.1.4' 
 
_symmetry_cell_setting            monoclinic 
_symmetry_space_group_name_H-M    'P 1 21/n 1' 
 
loop_ 
 _symmetry_equiv_pos_as_xyz 
 'x, y, z' 
 '-x+1/2, y+1/2, -z+1/2' 
 '-x, -y, -z' 
 'x-1/2, -y-1/2, z-1/2' 
 
_cell_length_a                    13.875(3) 
_cell_length_b                    8.6423(13) 
_cell_length_c                    31.850(4) 
_cell_angle_alpha                 90.00 
_cell_angle_beta                  95.062(14) 
_cell_angle_gamma                 90.00 
_cell_volume                      3804.4(11) 
_cell_formula_units_Z             4 
_cell_measurement_temperature     213(2) 
_cell_measurement_reflns_used     250 
_cell_measurement_theta_min       9.05 
_cell_measurement_theta_max       20.8 
 
_exptl_crystal_description        prism 
_exptl_crystal_colour             yellow 
_exptl_crystal_size_max           0.36 
_exptl_crystal_size_mid           0.33 
_exptl_crystal_size_min           0.24 
_exptl_crystal_density_meas       'not measured' 
_exptl_crystal_density_diffrn     1.609 
_exptl_crystal_density_method     'not measured' 
_exptl_crystal_F_000              1872 
_exptl_absorpt_coefficient_mu     2.385 
_exptl_absorpt_correction_type    multi-scan 
_exptl_absorpt_correction_T_min   0.44 
_exptl_absorpt_correction_T_max   0.56 
 
_exptl_special_details 
; 
 ? 
; 
 
_diffrn_ambient_temperature       213(2) 
_diffrn_radiation_wavelength      0.71073 
_diffrn_radiation_type            MoK\a 
_diffrn_radiation_source          'fine-focus sealed tube' 
_diffrn_radiation_monochromator   graphite 
_diffrn_measurement_device        'Nonius FAST area detector'
_diffrn_measurement_method        'Ellipsoid-mask fitting'
_diffrn_standards_number          none
_diffrn_standards_interval_count  none
_diffrn_standards_interval_time   none
_diffrn_standards_decay_%         none
_diffrn_reflns_number             15219 
_diffrn_reflns_av_R_equivalents   0.0439 
_diffrn_reflns_av_sigmaI/netI     0.0386 
_diffrn_reflns_limit_h_min        -16 
_diffrn_reflns_limit_h_max        15 
_diffrn_reflns_limit_k_min        -9 
_diffrn_reflns_limit_k_max        9 
_diffrn_reflns_limit_l_min        -35 
_diffrn_reflns_limit_l_max        28 
_diffrn_reflns_theta_min          2.32 
_diffrn_reflns_theta_max          24.92 
_reflns_number_total              5926 
_reflns_number_observed           4950 
_reflns_observed_criterion        >2sigma(I) 
 
_computing_data_collection        'MADNES (Enraf-Nonius, 1989)'
_computing_cell_refinement        'MADNES (Enraf-Nonius, 1989)'
_computing_data_reduction         'PROCOR (Kabsch, 1988)'
_computing_structure_solution     'SHELXTL V.5 (Siemens, 1994)'
_computing_structure_refinement   'SHELXL-93 (Sheldrick, 1993)'
_computing_molecular_graphics     'SHELXTL V.5 (Siemens, 1994)'
_computing_publication_material   CIFTAB
 
_refine_special_details 
; 
 Refinement on F^2^ for ALL reflections except for 2 with very negative F^2^ 
 or flagged by the user for potential systematic errors.  Weighted R-factors 
 wR and all goodnesses of fit S are based on F^2^, conventional R-factors R 
 are based on F, with F set to zero for negative F^2^. The observed criterion 
 of F^2^ > 2sigma(F^2^) is used only for calculating _R_factor_obs etc. and is 
 not relevant to the choice of reflections for refinement.  R-factors based 
 on F^2^ are statistically about twice as large as those based on F, and R- 
 factors based on ALL data will be even larger. 
; 
 
_refine_ls_structure_factor_coef  Fsqd  
_refine_ls_matrix_type            full 
_refine_ls_weighting_scheme 
 'calc w=1/[\s^2^(Fo^2^)+(0.0342P)^2^+16.4739P] where P=(Fo^2^+2Fc^2^)/3' 
_atom_sites_solution_primary      direct 
_atom_sites_solution_secondary    difmap 
_atom_sites_solution_hydrogens    geom 
_refine_ls_hydrogen_treatment     mixed 
_refine_ls_extinction_method      none 
_refine_ls_extinction_coef        ? 
_refine_ls_number_reflns          5924 
_refine_ls_number_parameters      612 
_refine_ls_number_restraints      0 
_refine_ls_R_factor_all           0.0640 
_refine_ls_R_factor_obs           0.0496 
_refine_ls_wR_factor_all          0.1219 
_refine_ls_wR_factor_obs          0.1100 
_refine_ls_goodness_of_fit_all    1.089 
_refine_ls_goodness_of_fit_obs    1.111 
_refine_ls_restrained_S_all       1.113 
_refine_ls_restrained_S_obs       1.111 
_refine_ls_shift/esd_max          -0.044 
_refine_ls_shift/esd_mean         0.001 
 
loop_ 
 _atom_site_label 
 _atom_site_type_symbol 
 _atom_site_fract_x 
 _atom_site_fract_y 
 _atom_site_fract_z 
 _atom_site_U_iso_or_equiv 
 _atom_site_thermal_displace_type 
 _atom_site_occupancy 
 _atom_site_calc_flag 
 _atom_site_refinement_flags 
 _atom_site_disorder_group 
Cu1 Cu 0.76040(4) 0.07336(7) 0.16726(2) 0.0313(2) Uani 1 d . . 
Cu2 Cu 0.58858(4) 0.09266(7) 0.15068(2) 0.0279(2) Uani 1 d . . 
Cu3 Cu 0.43262(5) 0.00741(9) 0.11928(2) 0.0451(2) Uani 1 d . . 
Cu4 Cu 0.63230(6) -0.18203(8) 0.10757(2) 0.0499(2) Uani 1 d . . 
Cl1 Cl 0.78320(11) -0.1845(2) 0.12881(4) 0.0435(3) Uani 1 d . . 
Cl2 Cl 0.48728(12) -0.2349(2) 0.08379(5) 0.0540(4) Uani 1 d . . 
N1 N 0.7699(3) 0.2208(4) 0.12242(12) 0.0249(8) Uani 1 d . . 
N2 N 0.6084(3) 0.2088(4) 0.10147(12) 0.0253(8) Uani 1 d . . 
N3 N 0.4504(3) 0.1630(5) 0.07750(12) 0.0321(9) Uani 1 d . . 
N4 N 0.7302(3) -0.0051(4) 0.22119(11) 0.0242(8) Uani 1 d . . 
N5 N 0.5680(3) -0.0210(4) 0.20048(11) 0.0245(8) Uani 1 d . . 
N6 N 0.4096(3) -0.0541(5) 0.17552(12) 0.0320(9) Uani 1 d . . 
C1 C 0.8649(3) 0.2782(6) 0.11844(14) 0.0279(10) Uani 1 d . . 
C2 C 0.9380(4) 0.1737(7) 0.1126(2) 0.0368(12) Uani 1 d . . 
C3 C 1.0317(4) 0.2239(8) 0.1096(2) 0.051(2) Uani 1 d . . 
C4 C 1.0537(4) 0.3805(8) 0.1133(2) 0.049(2) Uani 1 d . . 
C5 C 0.9821(4) 0.4840(7) 0.1200(2) 0.0465(15) Uani 1 d . . 
C6 C 0.8881(4) 0.4345(7) 0.1226(2) 0.0372(13) Uani 1 d . . 
C7 C 0.6981(3) 0.2659(5) 0.09624(14) 0.0260(10) Uani 1 d . . 
C8 C 0.7114(4) 0.3797(7) 0.0609(2) 0.0415(14) Uani 1 d . . 
C9 C 0.6386(4) 0.3569(8) 0.0240(2) 0.051(2) Uani 1 d . . 
C10 C 0.5388(4) 0.3490(7) 0.0373(2) 0.0371(12) Uani 1 d . . 
C11 C 0.5303(3) 0.2364(5) 0.07281(14) 0.0263(10) Uani 1 d . . 
C12 C 0.3689(3) 0.1795(6) 0.0465(2) 0.0324(11) Uani 1 d . . 
C13 C 0.2993(4) 0.2887(7) 0.0515(2) 0.0461(14) Uani 1 d . . 
C14 C 0.2214(4) 0.3027(9) 0.0209(2) 0.054(2) Uani 1 d . . 
C15 C 0.2132(4) 0.2055(8) -0.0132(2) 0.051(2) Uani 1 d . . 
C16 C 0.2808(4) 0.0951(8) -0.0171(2) 0.050(2) Uani 1 d . . 
C17 C 0.3594(4) 0.0800(7) 0.0124(2) 0.0395(13) Uani 1 d . . 
C18 C 0.8111(3) -0.0291(5) 0.25181(14) 0.0258(10) Uani 1 d . . 
C19 C 0.8844(4) -0.1297(6) 0.2429(2) 0.0317(11) Uani 1 d . . 
C20 C 0.9642(4) -0.1516(7) 0.2712(2) 0.0403(13) Uani 1 d . . 
C21 C 0.9720(4) -0.0744(7) 0.3093(2) 0.0421(14) Uani 1 d . . 
C22 C 0.9004(4) 0.0257(8) 0.3181(2) 0.0446(14) Uani 1 d . . 
C23 C 0.8204(4) 0.0498(7) 0.2902(2) 0.0352(12) Uani 1 d . . 
C24 C 0.6439(3) -0.0454(5) 0.23032(14) 0.0242(10) Uani 1 d . . 
C25 C 0.6262(4) -0.1177(7) 0.2717(2) 0.0323(11) Uani 1 d . . 
C26 C 0.5344(4) -0.2104(7) 0.2710(2) 0.0359(12) Uani 1 d . . 
C27 C 0.4529(4) -0.1171(7) 0.2501(2) 0.0363(12) Uani 1 d . . 
C28 C 0.4763(3) -0.0656(5) 0.20690(14) 0.0265(10) Uani 1 d . . 
C29 C 0.3125(3) -0.1027(7) 0.1805(2) 0.0360(12) Uani 1 d . . 
C30 C 0.2431(4) 0.0031(9) 0.1895(2) 0.058(2) Uani 1 d . . 
C31 C 0.1490(5) -0.0487(12) 0.1929(3) 0.073(2) Uani 1 d . . 
C32 C 0.1249(5) -0.1995(12) 0.1873(2) 0.070(2) Uani 1 d . . 
C33 C 0.1941(5) -0.3051(10) 0.1787(2) 0.064(2) Uani 1 d . . 
C34 C 0.2872(4) -0.2566(8) 0.1750(2) 0.0488(15) Uani 1 d . . 
O1S O 0.1547(5) -0.3304(8) 0.0228(2) 0.108(2) Uani 1 d . . 
C1S C 0.2035(6) -0.2748(11) 0.0601(2) 0.071(2) Uani 1 d . . 
C2S C 0.1598(6) -0.1248(10) 0.0697(3) 0.070(2) Uani 1 d . . 
C3S C 0.0630(8) -0.1326(13) 0.0471(4) 0.099(4) Uani 1 d . . 
C4S C 0.0673(7) -0.2563(15) 0.0155(3) 0.126(4) Uani 1 d . . 
H4SA H 0.0142(7) -0.3298(15) 0.0179(3) 0.152 Uiso 1 calc R . 
H4SB H 0.0610(7) -0.2122(15) -0.0129(3) 0.152 Uiso 1 calc R . 
H19 H 0.8827(29) -0.1732(50) 0.2193(15) 0.012(11) Uiso 1 d . . 
H10A H 0.5243(33) 0.4587(60) 0.0479(15) 0.026(12) Uiso 1 d . . 
H25A H 0.6270(35) -0.0399(63) 0.2907(17) 0.031(14) Uiso 1 d . . 
H27A H 0.3903(37) -0.1673(57) 0.2479(15) 0.029(13) Uiso 1 d . . 
H34 H 0.3325(40) -0.3272(65) 0.1666(17) 0.041(15) Uiso 1 d . . 
H21 H 1.0257(37) -0.0800(59) 0.3277(17) 0.033(14) Uiso 1 d . . 
H8B H 0.7758(43) 0.3745(67) 0.0533(18) 0.048(16) Uiso 1 d . . 
H4 H 1.1160(41) 0.4032(64) 0.1100(17) 0.041(15) Uiso 1 d . . 
H22 H 0.9084(48) 0.0715(82) 0.3399(23) 0.065(22) Uiso 1 d . . 
H20 H 1.0119(35) -0.2056(56) 0.2667(15) 0.021(12) Uiso 1 d . . 
H27A H 0.4536(42) -0.0258(74) 0.2653(20) 0.051(18) Uiso 1 d . . 
H1A H 0.2800(60) -0.2632(95) 0.0531(25) 0.098(26) Uiso 1 d . . 
H3 H 1.0847(40) 0.1658(64) 0.1075(17) 0.039(15) Uiso 1 d . . 
H31 H 0.1114(57) 0.0151(94) 0.2015(26) 0.086(28) Uiso 1 d . . 
H2 H 0.9230(36) 0.0727(65) 0.1092(16) 0.033(14) Uiso 1 d . . 
H9A H 0.6449(39) 0.4441(68) 0.0026(18) 0.047(16) Uiso 1 d . . 
H26B H 0.5226(42) -0.2226(71) 0.3007(20) 0.055(18) Uiso 1 d . . 
H13 H 0.3071(34) 0.3599(60) 0.0701(16) 0.025(14) Uiso 1 d . . 
H10A H 0.4958(44) 0.3198(71) 0.0151(20) 0.054(18) Uiso 1 d . . 
H6 H 0.8483(42) 0.4915(69) 0.1242(19) 0.041(19) Uiso 1 d . . 
H25B H 0.6820(46) -0.1884(76) 0.2818(20) 0.063(19) Uiso 1 d . . 
H17 H 0.4065(41) 0.0068(69) 0.0107(18) 0.047(17) Uiso 1 d . . 
H23 H 0.7755(45) 0.1086(74) 0.2944(20) 0.055(20) Uiso 1 d . . 
H32 H 0.0599(53) -0.2416(85) 0.1888(22) 0.078(22) Uiso 1 d . . 
H16 H 0.2774(36) 0.0348(61) -0.0392(17) 0.030(14) Uiso 1 d . . 
H26A H 0.5420(41) -0.3107(74) 0.2554(20) 0.055(18) Uiso 1 d . . 
H15 H 0.1609(54) 0.2168(89) -0.0313(24) 0.083(24) Uiso 1 d . . 
H30 H 0.2643(39) 0.1143(69) 0.1941(17) 0.043(15) Uiso 1 d . . 
H3SA H 0.0292(60) -0.0449(99) 0.0363(25) 0.088(26) Uiso 1 d . . 
H14 H 0.1866(48) 0.3798(82) 0.0232(22) 0.064(22) Uiso 1 d . . 
H2SA H 0.1492(59) -0.1158(100) 0.1002(29) 0.101(28) Uiso 1 d . . 
H5 H 0.9987(52) 0.5865(89) 0.1195(24) 0.082(24) Uiso 1 d . . 
H1SB H 0.1832(59) -0.3552(100) 0.0815(28) 0.101(29) Uiso 1 d . . 
H9B H 0.6692(53) 0.2389(94) 0.0117(24) 0.090(24) Uiso 1 d . . 
H2SB H 0.1971(82) -0.0437(138) 0.0539(37) 0.161(46) Uiso 1 d . . 
H33 H 0.1743(56) -0.4155(97) 0.1718(25) 0.093(26) Uiso 1 d . . 
H8A H 0.6944(52) 0.4946(92) 0.0687(23) 0.083(24) Uiso 1 d . . 
H3SA H 0.0121(100) -0.1473(170) 0.0669(44) 0.195(67) Uiso 1 d . . 
 
loop_ 
 _atom_site_aniso_label 
 _atom_site_aniso_U_11 
 _atom_site_aniso_U_22 
 _atom_site_aniso_U_33 
 _atom_site_aniso_U_23 
 _atom_site_aniso_U_13 
 _atom_site_aniso_U_12 
Cu1 0.0297(3) 0.0398(4) 0.0241(3) 0.0109(3) -0.0002(2) -0.0012(3) 
Cu2 0.0293(3) 0.0338(3) 0.0201(3) 0.0081(2) -0.0010(2) -0.0023(3) 
Cu3 0.0390(4) 0.0649(5) 0.0295(4) 0.0206(3) -0.0085(3) -0.0185(3) 
Cu4 0.0675(5) 0.0404(4) 0.0405(4) 0.0018(3) -0.0030(3) 0.0034(4) 
Cl1 0.0652(9) 0.0319(7) 0.0330(7) -0.0040(6) 0.0025(6) 0.0076(6) 
Cl2 0.0679(10) 0.0485(9) 0.0436(8) -0.0037(7) -0.0072(7) 0.0037(7) 
N1 0.029(2) 0.022(2) 0.024(2) 0.001(2) 0.004(2) -0.001(2) 
N2 0.026(2) 0.028(2) 0.022(2) 0.004(2) 0.001(2) -0.003(2) 
N3 0.034(2) 0.039(2) 0.023(2) 0.004(2) 0.000(2) -0.002(2) 
N4 0.030(2) 0.025(2) 0.017(2) -0.002(2) -0.002(2) -0.001(2) 
N5 0.027(2) 0.028(2) 0.018(2) 0.003(2) 0.002(2) -0.001(2) 
N6 0.030(2) 0.040(2) 0.025(2) 0.009(2) 0.002(2) -0.004(2) 
C1 0.029(2) 0.035(3) 0.019(2) 0.001(2) 0.000(2) 0.000(2) 
C2 0.038(3) 0.036(3) 0.037(3) -0.006(2) 0.005(2) -0.007(2) 
C3 0.033(3) 0.063(4) 0.057(4) -0.011(3) 0.008(3) 0.006(3) 
C4 0.034(3) 0.064(4) 0.051(4) -0.007(3) 0.008(3) -0.013(3) 
C5 0.051(4) 0.044(4) 0.044(3) 0.003(3) 0.003(3) -0.018(3) 
C6 0.038(3) 0.036(3) 0.036(3) -0.003(2) -0.002(2) -0.002(3) 
C7 0.034(3) 0.023(2) 0.021(2) -0.001(2) 0.003(2) 0.006(2) 
C8 0.037(3) 0.053(4) 0.033(3) 0.021(3) -0.005(2) -0.007(3) 
C9 0.046(3) 0.062(4) 0.046(4) 0.028(3) 0.002(3) -0.003(3) 
C10 0.037(3) 0.037(3) 0.036(3) 0.016(3) -0.003(2) 0.002(2) 
C11 0.031(2) 0.026(2) 0.023(2) 0.003(2) 0.005(2) 0.004(2) 
C12 0.027(2) 0.040(3) 0.030(3) 0.014(2) 0.001(2) 0.000(2) 
C13 0.048(3) 0.043(3) 0.046(4) 0.000(3) -0.005(3) 0.000(3) 
C14 0.041(3) 0.058(4) 0.061(4) 0.007(4) -0.004(3) 0.012(3) 
C15 0.038(3) 0.067(4) 0.047(4) 0.011(3) -0.008(3) -0.008(3) 
C16 0.050(4) 0.059(4) 0.039(3) -0.001(3) -0.007(3) -0.004(3) 
C17 0.042(3) 0.044(3) 0.032(3) 0.002(3) -0.002(2) 0.003(3) 
C18 0.034(3) 0.022(2) 0.021(2) 0.003(2) 0.000(2) -0.003(2) 
C19 0.036(3) 0.030(3) 0.028(3) -0.002(2) 0.001(2) -0.001(2) 
C20 0.031(3) 0.040(3) 0.049(4) 0.009(3) -0.001(3) 0.008(3) 
C21 0.036(3) 0.058(4) 0.031(3) 0.009(3) -0.009(2) -0.005(3) 
C22 0.047(3) 0.056(4) 0.030(3) -0.005(3) -0.005(3) -0.005(3) 
C23 0.036(3) 0.040(3) 0.028(3) -0.005(2) 0.000(2) -0.003(3) 
C24 0.033(2) 0.023(2) 0.016(2) 0.003(2) 0.001(2) 0.001(2) 
C25 0.040(3) 0.036(3) 0.020(3) 0.008(2) 0.002(2) -0.005(2) 
C26 0.037(3) 0.044(3) 0.028(3) 0.009(3) 0.006(2) 0.000(2) 
C27 0.037(3) 0.047(3) 0.026(3) 0.005(3) 0.005(2) -0.003(3) 
C28 0.036(3) 0.025(2) 0.019(2) 0.004(2) 0.002(2) 0.001(2) 
C29 0.029(3) 0.057(4) 0.022(3) 0.007(2) 0.000(2) -0.006(2) 
C30 0.039(3) 0.060(4) 0.076(5) 0.006(4) 0.010(3) 0.003(3) 
C31 0.045(4) 0.103(7) 0.073(5) 0.006(5) 0.018(4) 0.021(5) 
C32 0.043(4) 0.116(7) 0.052(4) -0.003(4) 0.009(3) -0.026(4) 
C33 0.060(4) 0.078(5) 0.055(4) -0.008(4) 0.008(3) -0.030(4) 
C34 0.046(3) 0.055(4) 0.047(4) -0.004(3) 0.014(3) -0.009(3) 
O1S 0.100(4) 0.113(5) 0.107(5) -0.051(4) -0.009(4) 0.038(4) 
C1S 0.071(5) 0.091(6) 0.052(4) 0.000(4) 0.012(4) 0.017(4) 
C2S 0.084(5) 0.069(5) 0.057(5) 0.003(4) 0.008(4) -0.001(4) 
C3S 0.100(7) 0.083(6) 0.107(8) -0.032(6) -0.028(6) 0.040(6) 
C4S 0.088(6) 0.174(11) 0.108(8) -0.067(8) -0.036(6) 0.053(7) 
 
_geom_special_details 
; 
 All esds (except the esd in the dihedral angle between two l.s. planes) 
 are estimated using the full covariance matrix.  The cell esds are taken 
 into account individually in the estimation of esds in distances, angles 
 and torsion angles; correlations between esds in cell parameters are only 
 used when they are defined by crystal symmetry.  An approximate (isotropic) 
 treatment of cell esds is used for estimating esds involving l.s. planes. 
; 
 
loop_ 
 _geom_bond_atom_site_label_1 
 _geom_bond_atom_site_label_2 
 _geom_bond_distance 
 _geom_bond_site_symmetry_2 
 _geom_bond_publ_flag 
Cu1 N4 1.927(4) . ? 
Cu1 N1 1.927(4) . ? 
Cu1 Cu2 2.4017(9) . ? 
Cu1 Cl1 2.5761(15) . ? 
Cu2 N2 1.901(4) . ? 
Cu2 N5 1.909(4) . ? 
Cu2 Cu3 2.4174(9) . ? 
Cu2 Cu4 2.8349(10) . ? 
Cu3 N6 1.922(4) . ? 
Cu3 N3 1.923(4) . ? 
Cu3 Cl2 2.528(2) . ? 
Cu4 Cl2 2.136(2) . ? 
Cu4 Cl1 2.143(2) . ? 
N1 C7 1.302(6) . ? 
N1 C1 1.424(6) . ? 
N2 C7 1.362(6) . ? 
N2 C11 1.375(6) . ? 
N3 C11 1.297(6) . ? 
N3 C12 1.441(6) . ? 
N4 C24 1.305(6) . ? 
N4 C18 1.436(6) . ? 
N5 C28 1.362(6) . ? 
N5 C24 1.371(6) . ? 
N6 C28 1.305(6) . ? 
N6 C29 1.434(6) . ? 
C1 C2 1.383(7) . ? 
C1 C6 1.392(8) . ? 
C2 C3 1.381(8) . ? 
C3 C4 1.390(9) . ? 
C4 C5 1.367(9) . ? 
C5 C6 1.383(8) . ? 
C7 C8 1.519(7) . ? 
C8 C9 1.493(8) . ? 
C9 C10 1.485(8) . ? 
C10 C11 1.504(7) . ? 
C12 C13 1.370(8) . ? 
C12 C17 1.383(8) . ? 
C13 C14 1.395(8) . ? 
C14 C15 1.369(10) . ? 
C15 C16 1.352(9) . ? 
C16 C17 1.381(8) . ? 
C18 C19 1.386(7) . ? 
C18 C23 1.395(7) . ? 
C19 C20 1.380(7) . ? 
C20 C21 1.379(8) . ? 
C21 C22 1.366(9) . ? 
C22 C23 1.376(8) . ? 
C24 C25 1.499(6) . ? 
C25 C26 1.504(7) . ? 
C26 C27 1.497(8) . ? 
C27 C28 1.509(7) . ? 
C29 C30 1.377(8) . ? 
C29 C34 1.383(8) . ? 
C30 C31 1.392(10) . ? 
C31 C32 1.354(12) . ? 
C32 C33 1.369(11) . ? 
C33 C34 1.372(9) . ? 
O1S C4S 1.373(10) . ? 
O1S C1S 1.398(9) . ? 
C1S C2S 1.474(11) . ? 
C2S C3S 1.468(12) . ? 
C3S C4S 1.472(13) . ? 
 
loop_ 
 _geom_angle_atom_site_label_1 
 _geom_angle_atom_site_label_2 
 _geom_angle_atom_site_label_3 
 _geom_angle 
 _geom_angle_site_symmetry_1 
 _geom_angle_site_symmetry_3 
 _geom_angle_publ_flag 
N4 Cu1 N1 158.1(2) . . ? 
N4 Cu1 Cu2 86.04(11) . . ? 
N1 Cu1 Cu2 85.58(11) . . ? 
N4 Cu1 Cl1 99.47(12) . . ? 
N1 Cu1 Cl1 101.57(12) . . ? 
Cu2 Cu1 Cl1 96.70(4) . . ? 
N2 Cu2 N5 179.1(2) . . ? 
N2 Cu2 Cu1 90.26(11) . . ? 
N5 Cu2 Cu1 89.99(11) . . ? 
N2 Cu2 Cu3 90.53(11) . . ? 
N5 Cu2 Cu3 89.60(11) . . ? 
Cu1 Cu2 Cu3 154.79(4) . . ? 
N2 Cu2 Cu4 89.42(12) . . ? 
N5 Cu2 Cu4 91.46(12) . . ? 
Cu1 Cu2 Cu4 78.32(3) . . ? 
Cu3 Cu2 Cu4 76.49(3) . . ? 
N6 Cu3 N3 151.7(2) . . ? 
N6 Cu3 Cu2 85.12(12) . . ? 
N3 Cu3 Cu2 84.73(12) . . ? 
N6 Cu3 Cl2 105.58(14) . . ? 
N3 Cu3 Cl2 101.99(13) . . ? 
Cu2 Cu3 Cl2 98.31(5) . . ? 
Cl2 Cu4 Cl1 166.76(7) . . ? 
Cl2 Cu4 Cu2 96.64(5) . . ? 
Cl1 Cu4 Cu2 95.77(4) . . ? 
Cu4 Cl1 Cu1 89.07(5) . . ? 
Cu4 Cl2 Cu3 88.55(6) . . ? 
C7 N1 C1 120.1(4) . . ? 
C7 N1 Cu1 125.0(3) . . ? 
C1 N1 Cu1 114.9(3) . . ? 
C7 N2 C11 122.1(4) . . ? 
C7 N2 Cu2 119.5(3) . . ? 
C11 N2 Cu2 118.4(3) . . ? 
C11 N3 C12 120.0(4) . . ? 
C11 N3 Cu3 125.8(3) . . ? 
C12 N3 Cu3 113.7(3) . . ? 
C24 N4 C18 119.2(4) . . ? 
C24 N4 Cu1 124.6(3) . . ? 
C18 N4 Cu1 116.0(3) . . ? 
C28 N5 C24 121.5(4) . . ? 
C28 N5 Cu2 118.7(3) . . ? 
C24 N5 Cu2 119.6(3) . . ? 
C28 N6 C29 120.2(4) . . ? 
C28 N6 Cu3 124.8(3) . . ? 
C29 N6 Cu3 114.8(3) . . ? 
C2 C1 C6 118.7(5) . . ? 
C2 C1 N1 118.7(4) . . ? 
C6 C1 N1 122.5(5) . . ? 
C3 C2 C1 120.7(5) . . ? 
C2 C3 C4 120.1(6) . . ? 
C5 C4 C3 119.5(5) . . ? 
C4 C5 C6 120.6(6) . . ? 
C5 C6 C1 120.4(6) . . ? 
N1 C7 N2 118.0(4) . . ? 
N1 C7 C8 122.1(4) . . ? 
N2 C7 C8 119.9(4) . . ? 
C9 C8 C7 112.3(5) . . ? 
C10 C9 C8 111.4(5) . . ? 
C9 C10 C11 112.5(4) . . ? 
N3 C11 N2 118.1(4) . . ? 
N3 C11 C10 121.9(4) . . ? 
N2 C11 C10 120.1(4) . . ? 
C13 C12 C17 120.0(5) . . ? 
C13 C12 N3 120.6(5) . . ? 
C17 C12 N3 119.4(5) . . ? 
C12 C13 C14 119.3(6) . . ? 
C15 C14 C13 120.4(6) . . ? 
C16 C15 C14 119.7(6) . . ? 
C15 C16 C17 121.1(6) . . ? 
C16 C17 C12 119.4(6) . . ? 
C19 C18 C23 118.3(5) . . ? 
C19 C18 N4 119.6(4) . . ? 
C23 C18 N4 122.0(4) . . ? 
C20 C19 C18 120.8(5) . . ? 
C21 C20 C19 120.3(5) . . ? 
C22 C21 C20 119.0(5) . . ? 
C21 C22 C23 121.6(6) . . ? 
C22 C23 C18 119.9(5) . . ? 
N4 C24 N5 117.9(4) . . ? 
N4 C24 C25 122.1(4) . . ? 
N5 C24 C25 119.9(4) . . ? 
C24 C25 C26 114.4(4) . . ? 
C27 C26 C25 109.0(5) . . ? 
C26 C27 C28 110.5(4) . . ? 
N6 C28 N5 118.2(4) . . ? 
N6 C28 C27 121.7(4) . . ? 
N5 C28 C27 120.0(4) . . ? 
C30 C29 C34 119.4(5) . . ? 
C30 C29 N6 120.7(5) . . ? 
C34 C29 N6 119.9(5) . . ? 
C29 C30 C31 118.7(7) . . ? 
C32 C31 C30 121.5(8) . . ? 
C31 C32 C33 119.9(7) . . ? 
C32 C33 C34 119.7(7) . . ? 
C33 C34 C29 120.9(7) . . ? 
C4S O1S C1S 109.7(6) . . ? 
O1S C1S C2S 107.5(7) . . ? 
C3S C2S C1S 103.5(7) . . ? 
C2S C3S C4S 106.1(8) . . ? 
O1S C4S C3S 108.2(7) . . ? 
 
_refine_diff_density_max    1.057 
_refine_diff_density_min   -0.938 
_refine_diff_density_rms    0.097 

#===END
